# Supplementary material
Source: publisher figshare collection journal article supplement (https://acs.figshare.com/ndownloader/files/21985161)
Supplement: Supplementary file 1 [file 21985161]

## Supporting Information

# A Double-Walled Knotted Cage for Guest-Adaptive Molecular Recognition

Yukari Tamura<sup>†</sup>, Hiroki Takezawa<sup>\*,†</sup>, and Makoto Fujita<sup>\*,†,‡</sup>

<sup>†</sup>Department of Applied Chemistry, School of Engineering, The University of Tokyo, 7-3-1 Hongo, Bunkyo-ku, Tokyo 113-8656, Japan. <sup>‡</sup>Division of Advanced Molecular Science, Institute for Molecular Science (IMS), 5-1 Higashiyama, Myodaiji, Okazaki, Aichi 444-8787, Japan

E-mail:

## Contents

|                                                                                                  |     |
|--------------------------------------------------------------------------------------------------|-----|
| 1. Materials and instrumentations                                                                | S2  |
| 2. Synthesis and physical properties of ligand <b>2</b>                                          | S3  |
| 3. Synthesis and physical properties of cage <b>1</b>                                            | S8  |
| 4. Inclusion experiments                                                                         | S17 |
| 5. X-ray crystallographic analyses of cage <b>1</b> , <b>1</b> •CCl <sub>4</sub> , and <b>S3</b> | S31 |
| 6. Sequential guest binding                                                                      | S35 |

## 1. Materials and instrumentations

$^1\text{H}$  and  $^{13}\text{C}$  NMR spectra were recorded on a Bruker AVANCE III or a Bruker AVANCE 500 equipped with CP-TCI cryoprobe (500 MHz for  $^1\text{H}$  NMR and 125 MHz for  $^{13}\text{C}$  NMR) at 300 K unless otherwise stated. TMS ( $\text{CDCl}_3$  solution) in a capillary served as an internal standard for  $^1\text{H}$  NMR ( $\delta = 0$  ppm). GC-MS data were obtained on an Agilent 5977B inert Mass selective Detector equipped with a 7820A Network GC system and an EI source. ESI-MS data were recorded on a Bruker maXis. The MALDI-TOF mass spectra were obtained using a Bruker Daltonics Autoflex Speed spectrometer with dithranol as the matrix. IR measurements were carried out using a DIGILAB Scimitar FTS-2000 instrument. Melting points were determined on a Stanford Research Systems OptiMelt. Elemental analyses were performed at the Elemental Analysis Center (School of Science, The University of Tokyo). Single crystal X-ray diffraction data were collected on a BRUKER APEX-II CCD rotating anode diffractometer equipped with focusing mirrors with  $\text{MoK}_\alpha$  ( $\lambda = 0.71073 \text{ \AA}$ ) radiation under cryogenic conditions, which are controlled with a cryostat system equipped with an  $\text{N}_2$  generator (Japan Thermal Eng. Co., Ltd.) or a Synergy-S diffractometer (Rigaku Oxford Diffraction), which is equipped with a micro-focus  $\text{CuK}_\alpha$  radiation source ( $\lambda = 1.5418 \text{ \AA}$ ), a high-sensitive CCD detector, and a low temperature system using cold nitrogen stream (100 K). Solvents and reagents were purchased from TCI Co., Ltd., Wako Pure Chemical Industries Ltd., Kanto Chemical Co., Inc., and Sigma-Aldrich Co. and used without any further purification.

## 2. Synthesis and physical properties of ligand 2

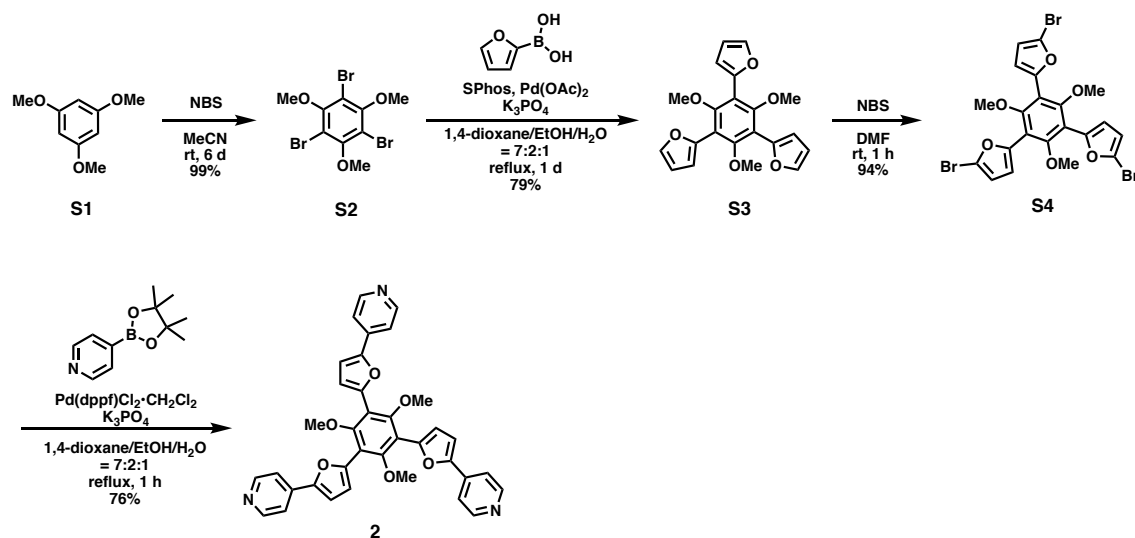

### 1,3,5-Tribromo-2,4,6-trimethoxybenzene (S2)

A mixture of 1,3,5-trimethoxybenzene (S1, 5.00 g, 29.7 mmol) and *N*-bromosuccinimide (21.0 g, 118 mmol) in CH<sub>3</sub>CN (50 mL) was stirred at room temperature for 6 d. The solvent was removed under reduced pressure, and EtOAc was added. The solution was washed with H<sub>2</sub>O, Na<sub>2</sub>S<sub>2</sub>O<sub>4</sub> aq. and NaHCO<sub>3</sub> aq. The organic layer was dried over anhydrous Na<sub>2</sub>SO<sub>4</sub> and filtered. The solvent was removed under reduced pressure to give 1,3,5-tribromo-2,4,6-trimethoxybenzene (S2) quantitatively as a white powder (11.9 g, 29.3 mmol, 99%).<sup>S1</sup>

**Physical data of S2:** white powder. <sup>1</sup>H NMR (CDCl<sub>3</sub>, 500 MHz): δ 3.89 (s, 9H, CH<sub>3</sub>); <sup>13</sup>C NMR (CDCl<sub>3</sub>, 125 MHz): δ 155.0 (C), 110.1 (CBr), 60.7 (CH<sub>3</sub>). GC/MS (EI) *m/z*: 405.8 [M]<sup>+</sup>.

### 1,3,5-Tris(2-furyl)-2,4,6-trimethoxybenzene (S3)

A mixture of 1,3,5-tribromo-2,4,6-trimethoxybenzene (S2, 5.01 g, 12.3 mmol), 2-furylboronic acid (4.97 g, 44.5 mmol), Pd(OAc)<sub>2</sub> (280 mg, 1.23 mmol), SPhos (1.01 g, 2.47 mmol) and K<sub>3</sub>PO<sub>4</sub> (13.0 g, 61.7 mmol) in a mixed solvent of 1,4-dioxane (28 mL), ethanol (8 mL) and H<sub>2</sub>O (4 mL) was refluxed under Ar atmosphere for 19 h. CHCl<sub>3</sub> (80 mL) was added to the mixture and the organic layer was collected and washed with H<sub>2</sub>O (100 mL×2) and brine (100 mL×2). The organic layer was dried over anhydrous Na<sub>2</sub>SO<sub>4</sub> and filtered. The solvent was removed under reduced pressure. The crude product was purified by column chromatography on silica gel (*n*-hexane/EtOAc = 98:2) to provide 1,3,5-tris(2-furyl)-2,4,6-trimethoxybenzene (S3) as a white crystalline powder (3.56 g, 9.72 mmol, 79%).<sup>S2</sup>

**Physical data of S3:** white crystalline powder.  $^1\text{H}$  NMR ( $\text{CDCl}_3$ , 500 MHz):  $\delta$  7.57 (t,  $J = 1.0$  Hz, 3H, ArH), 6.64 (dd,  $J = 0.8, 3.3$  Hz, 3H, ArH), 6.53 (dd,  $J = 1.8, 3.3$  Hz, 3H, ArH), 3.39 (s, 9H,  $\text{CH}_3$ );  $^{13}\text{C}$  NMR ( $\text{CDCl}_3$ , 125 MHz):  $\delta$  158.5 (C), 146.2 (C), 142.3 (CH), 116.1 (C), 111.1 (CH), 111.0 (CH), 61.2 ( $\text{CH}_3$ ). GC/MS (EI)  $m/z$ : 366.1  $[\text{M}]^+$ .

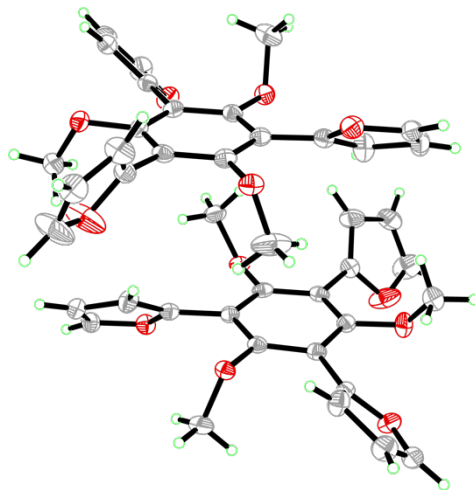

**Figure S1.** ORTEP drawing (50% probability ellipsoids) of the refinement structure of **S3** (CCDC reference number: 1984215).

#### 1,3,5-Tris(5-bromofuran-2-yl)-2,4,6-trimethoxybenzene (**S4**)

A mixture of 1,3,5-tris(2-furyl)-2,4,6-trimethoxybenzene (**S3**, 1.00 g, 2.73 mmol) and *N*-bromosuccinimide (1.61 g, 9.04 mmol) in *N,N*-dimethylformamide (10 mL) was stirred at room temperature for 1 h.  $\text{Et}_2\text{O}$  (50 mL) and  $\text{H}_2\text{O}$  (150 mL) were added to the mixture and the organic layer was collected. The organic layer was washed with  $\text{H}_2\text{O}$ ,  $\text{Na}_2\text{S}_2\text{O}_4$  aq. and  $\text{NaHCO}_3$  aq. then dried over anhydrous  $\text{Na}_2\text{SO}_4$  and filtered. The solvent was removed under reduced pressure. The crude product was purified by column chromatography on silica gel (*n*-hexane/ $\text{EtOAc} = 9:1$ ) to provide 1,3,5-tris(5-bromofuran-2-yl)-2,4,6-trimethoxybenzene (**S4**) as a white powder (1.55 g, 2.57 mmol, 94%).

**Physical data of S4:** white powder.  $^1\text{H}$  NMR ( $\text{CDCl}_3$ , 500 MHz):  $\delta$  6.60 (d,  $J = 3.0$  Hz, 3H, ArH), 6.44 (d,  $J = 3.0$  Hz, 3H, ArH), 3.48 (s, 9H,  $\text{CH}_3$ );  $^{13}\text{C}$  NMR ( $\text{CDCl}_3$ , 125 MHz):  $\delta$  158.8 (C), 148.1 (C), 121.8 (C), 115.6 (C), 114.1 (CH), 112.9 (CH), 61.7 ( $\text{CH}_3$ ). IR (ATR,  $\text{cm}^{-1}$ ): 2359, 2344, 2335, 2327, 2321, 1080, 1016, 956, 931, 776, 719, 666. m.p.: 125–126  $^\circ\text{C}$ . MALDI-TOF-MS (ESI): calcd. for  $[\text{M}]^+$ : 599.8, found 599.6. Elemental analysis (%): calcd. for  $\text{C}_{21}\text{H}_{15}\text{Br}_3\text{O}_6$ : C 41.83, H 2.51, N: 0.00; found: C 41.94, H 2.70, N 0.00.



### 1,3,5-Tris(5-(pyridine-4-yl)furan-2-yl)-2,4,6-trimethoxybenzene (2)

A mixture of 1,3,5-tris(5-bromofuran-2-yl)-2,4,6-trimethoxybenzene (**S4**, 511 mg, 0.847 mmol), 4-pyridylboronic acid pinacol ester (571 mg, 2.78 mmol), Pd(dppf)Cl<sub>2</sub>•CH<sub>2</sub>Cl<sub>2</sub> (206 mg, 0.252 mmol) and K<sub>3</sub>PO<sub>4</sub> (891 mg, 4.20 mmol) in a mixed solvent of 1,4-dioxane (21 mL), ethanol (6 mL) and H<sub>2</sub>O (3 mL) was refluxed under Ar atmosphere for 1 h. EtOAc (80 mL) was added to the mixture and filtered. The organic layer was washed with H<sub>2</sub>O (100 mL×3) and extracted with 50 mM HCl aq (60 mL×2). The aqueous layer was neutralized with NaOH aq. and extracted with EtOAc. The organic layer was dried over anhydrous Na<sub>2</sub>SO<sub>4</sub> and filtered. The solvent was removed under reduced pressure. The crude product was purified by recrystallization from EtOAc and *n*-hexane to provide 1,3,5-tris(5-(pyridine-4-yl)furan-2-yl)-2,4,6-trimethoxybenzene (**2**) as an off-white powder (385 mg, 0.644 mmol, 76%).

**Physical data of 2:** off-white powder. <sup>1</sup>H NMR (CDCl<sub>3</sub>, 500 MHz): δ 8.61 (d, *J* = 5.5 Hz, 6H, PyH<sub>a</sub>), 7.58 (d, *J* = 5.5 Hz, 6H, PyH<sub>b</sub>), 7.06 (d, *J* = 3.5 Hz, 3H, ArH), 6.86 (d, *J* = 3.5 Hz, 3H, ArH), 3.57 (s, 9H, CH<sub>3</sub>); <sup>13</sup>C NMR (CDCl<sub>3</sub>, 125 MHz): δ 158.9 (C), 151.0 (C), 150.2 (CH), 147.6 (C), 117.7 (CH), 115.9 (C), 114.1 (CH), 110.4 (CH), 61.7 (CH<sub>3</sub>). IR (ATR, cm<sup>-1</sup>): 2973, 2935, 2363, 1592, 1455, 1080, 730, 712. m.p.: 168–169 °C. HR-MS (ESI): calcd for [M+H]<sup>+</sup>: 598.1973, found: 598.1998.

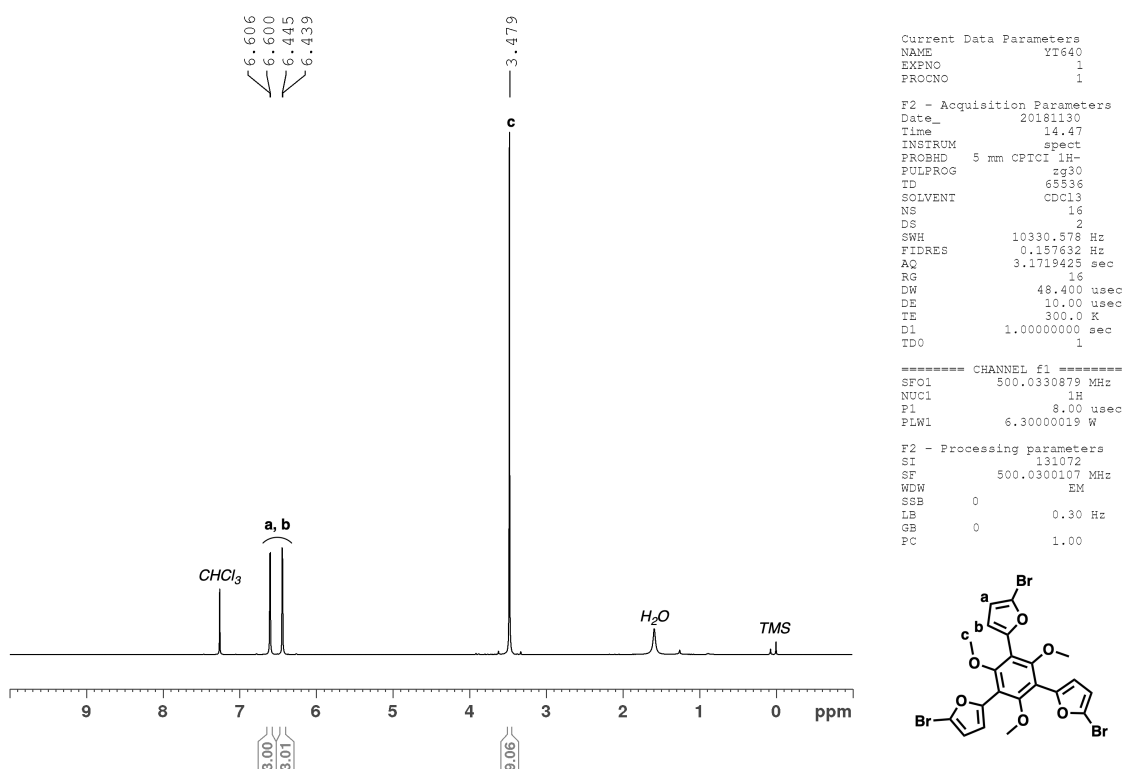

**Figure S2.** <sup>1</sup>H NMR spectrum (500 MHz, 300 K, CDCl<sub>3</sub>) of **S4**.



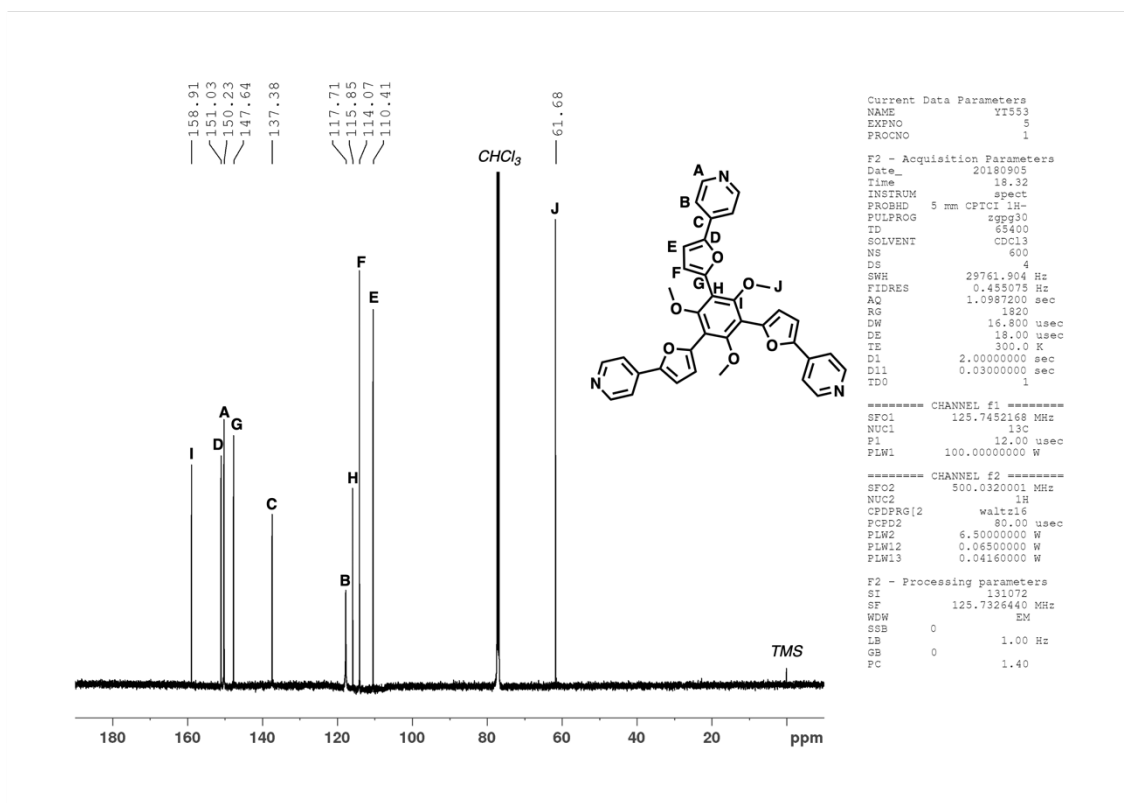

### 3. Synthesis and physical properties of cage 1

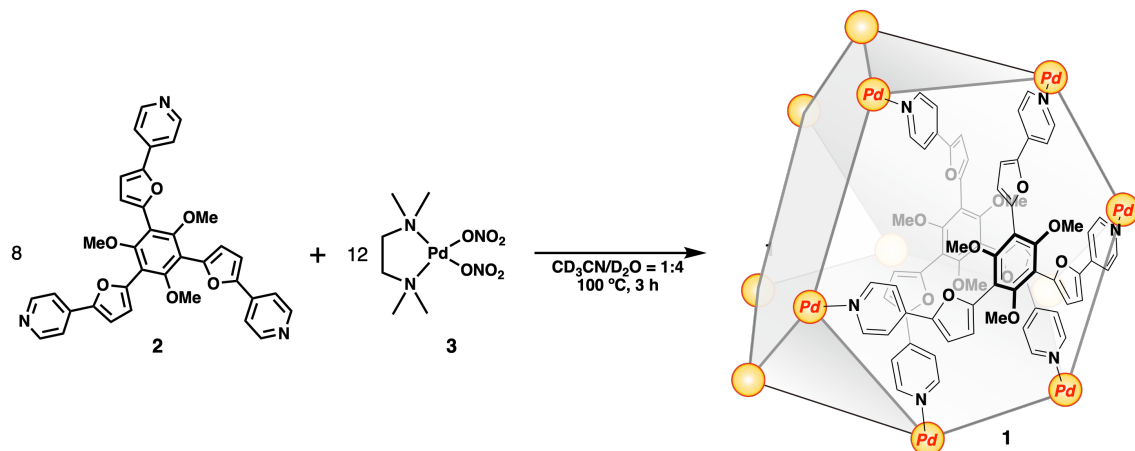

1,3,5-Tris(5-(pyridine-4-yl)furan-2-yl)-2,4,6-trimethoxybenzene (**2**, 60.0 mg, 100  $\mu$ mol) and (tmeda)Pd(ONO<sub>2</sub>)<sub>2</sub> (**3**, 52.0 mg, 150  $\mu$ mol) were added in acetonitrile-*d*<sub>3</sub>/D<sub>2</sub>O (5.0 mL, 1:4 v/v). After stirring at 100 °C for 3 h, a trace amount of insoluble material was filtrated. The quantitative formation of cage **1** was confirmed by <sup>1</sup>H NMR spectroscopy.

**Physical data of 1:** <sup>1</sup>H NMR (acetonitrile-*d*<sub>3</sub>/D<sub>2</sub>O (1:4 v/v), 500 MHz):  $\delta$  10.16 (d,  $J$  = 5.5 Hz, 4H, ArH), 10.09 (d,  $J$  = 6.0 Hz, 4H, ArH), 9.68 (d,  $J$  = 6.0 Hz, 4H, ArH), 9.62 (d,  $J$  = 6.0 Hz, 4H, ArH), 9.58 (d,  $J$  = 6.0 Hz, 4H, ArH), 9.54 (d,  $J$  = 6.0 Hz, 4H, ArH), 9.50 (d,  $J$  = 6.0 Hz, 4H, ArH), 9.38 (d,  $J$  = 6.0 Hz, 4H, ArH), 9.35 (d,  $J$  = 6.0 Hz, 4H, ArH), 9.24 (d,  $J$  = 4.5 Hz, 8H, ArH), 9.11 (d,  $J$  = 6.0 Hz, 4H, ArH), 8.21 (d,  $J$  = 5.5 Hz, 4H, ArH), 7.81 (d,  $J$  = 5.5 Hz, 4H, ArH), 7.70 (d,  $J$  = 5.5 Hz, 12H, ArH), 7.66 (d,  $J$  = 5.5 Hz, 4H, ArH), 7.65 (d,  $J$  = 5.5 Hz, 4H, ArH), 7.60 (d,  $J$  = 5.5 Hz, 4H, ArH), 7.56 (d,  $J$  = 5.5 Hz, 4H, ArH), 7.54 (d,  $J$  = 5.5 Hz, 4H, ArH), 7.45 (d,  $J$  = 5.5 Hz, 4H, ArH), 7.17 (d,  $J$  = 3.5 Hz, 4H, ArH), 7.11 (d,  $J$  = 5.0 Hz, 4H, ArH), 7.07 (d,  $J$  = 3.5 Hz, 4H, ArH), 7.05 (d,  $J$  = 4.0 Hz, 4H, ArH), 6.78 (d,  $J$  = 3.5 Hz, 4H, ArH), 6.77 (d,  $J$  = 4.0 Hz, 4H, ArH), 6.61 (d,  $J$  = 3.5 Hz, 4H, ArH), 5.88 (d,  $J$  = 3.5 Hz, 4H, ArH), 5.80 (d,  $J$  = 3.0 Hz, 4H, ArH), 5.36 (d,  $J$  = 3.0 Hz, 4H, ArH), 5.33 (d,  $J$  = 3.0 Hz, 4H, ArH), 4.92 (d,  $J$  = 3.5 Hz, 4H, ArH), 4.46 (d,  $J$  = 3.0 Hz, 4H, ArH), 3.92 (s, 12H, -OMe), 3.82 (s, 12H, -OMe), 3.62 (s, 12H, -OMe), 3.49 (s, 12H, -OMe), 3.49–3.23 (br, 40H, -CH<sub>2</sub>-), 3.27 (s, 12H, -OMe), 3.26 (s, 12H, CH<sub>3</sub>), 3.18 (s, 36H, CH<sub>3</sub>), 3.07 (br, 8H, -CH<sub>2</sub>-), 3.06 (s, 12H, CH<sub>3</sub>), 3.04 (s, 12H, CH<sub>3</sub>), 2.97 (s, 24H, CH<sub>3</sub>), 2.94 (s, 24H, CH<sub>3</sub>), 2.92 (s, 12H, CH<sub>3</sub>), 2.91 (s, 12H, CH<sub>3</sub>), 2.05 (s, 12H, -OMe); <sup>13</sup>C NMR (acetonitrile-*d*<sub>3</sub>/D<sub>2</sub>O (1:4 v/v), 125 MHz):  $\delta$  157.1 (C), 157.0 (C), 156.9 (C), 156.7 (C), 155.8 (C), 153.2 (CH), 152.6 (CH), 152.5 (CH), 151.9 (CH), 151.8 (CH), 151.6 (CH), 151.1 (CH), 151.1 (CH), 150.7 (CH), 150.0 (C), 149.5 (C), 149.0 (C), 148.7 (C), 148.5 (C), 148.1 (C), 147.9 (C), 147.6 (C), 147.5 (C), 147.4 (C), 147.1 (C), 140.4 (C), 140.3 (C), 139.6 (C), 139.2 (C), 121.2 (CH), 121.0 (CH), 120.9 (CH), 120.7 (CH), 120.6 (CH), 120.3 (CH), 120.2 (CH), 119.6 (CH), 116.7 (C), 116.1 (CH), 115.8 (C), 115.8 (CH), 115.6 (CH), 115.3 (C), 115.3 (CH), 114.9 (C), 114.9 (CH), 114.4 (CH), 114.3 (CH), 114.1 (CH), 113.5 (CH), 112.5 (CH), 112.1 (CH), 111.9 (C), 111.8 (CH), 63.4 (-OMe), 63.2 (-CH<sub>2</sub>-), 63.1 (-CH<sub>2</sub>-), 62.9 (-CH<sub>2</sub>-), 62.5 (-CH<sub>2</sub>-), 61.5 (-OMe), 61.1 (-OMe), 61.1 (-OMe), 60.9 (-OMe), 59.2 (-OMe), 51.4 (CH<sub>3</sub>), 51.2 (CH<sub>3</sub>), 51.0 (CH<sub>3</sub>), 50.9 (CH<sub>3</sub>), 50.9 (CH<sub>3</sub>), 50.7 (CH<sub>3</sub>), 50.7 (CH<sub>3</sub>), 50.5 (CH<sub>3</sub>), 50.4 (CH<sub>3</sub>). DOSY-NMR (acetonitrile-*d*<sub>3</sub>/D<sub>2</sub>O (1:4 v/v), m<sup>2</sup>/s):  $D$  =  $1.26 \times 10^{-10}$ . IR (ATR, cm<sup>-1</sup>): 2968, 2886, 2367, 2360, 2343, 2331, 1341, 1044, 811, 719, 656, 627, 560. m.p.: > 155 °C

(decomposed). HR-MS (ESI): calcd. for  $[(C_{36}H_{27}N_3O_6)_8(C_6H_{16}N_2Pd)_{12}(BF_4)_{16}]^{8+}$ : 1105.1267, found: 1105.1280.

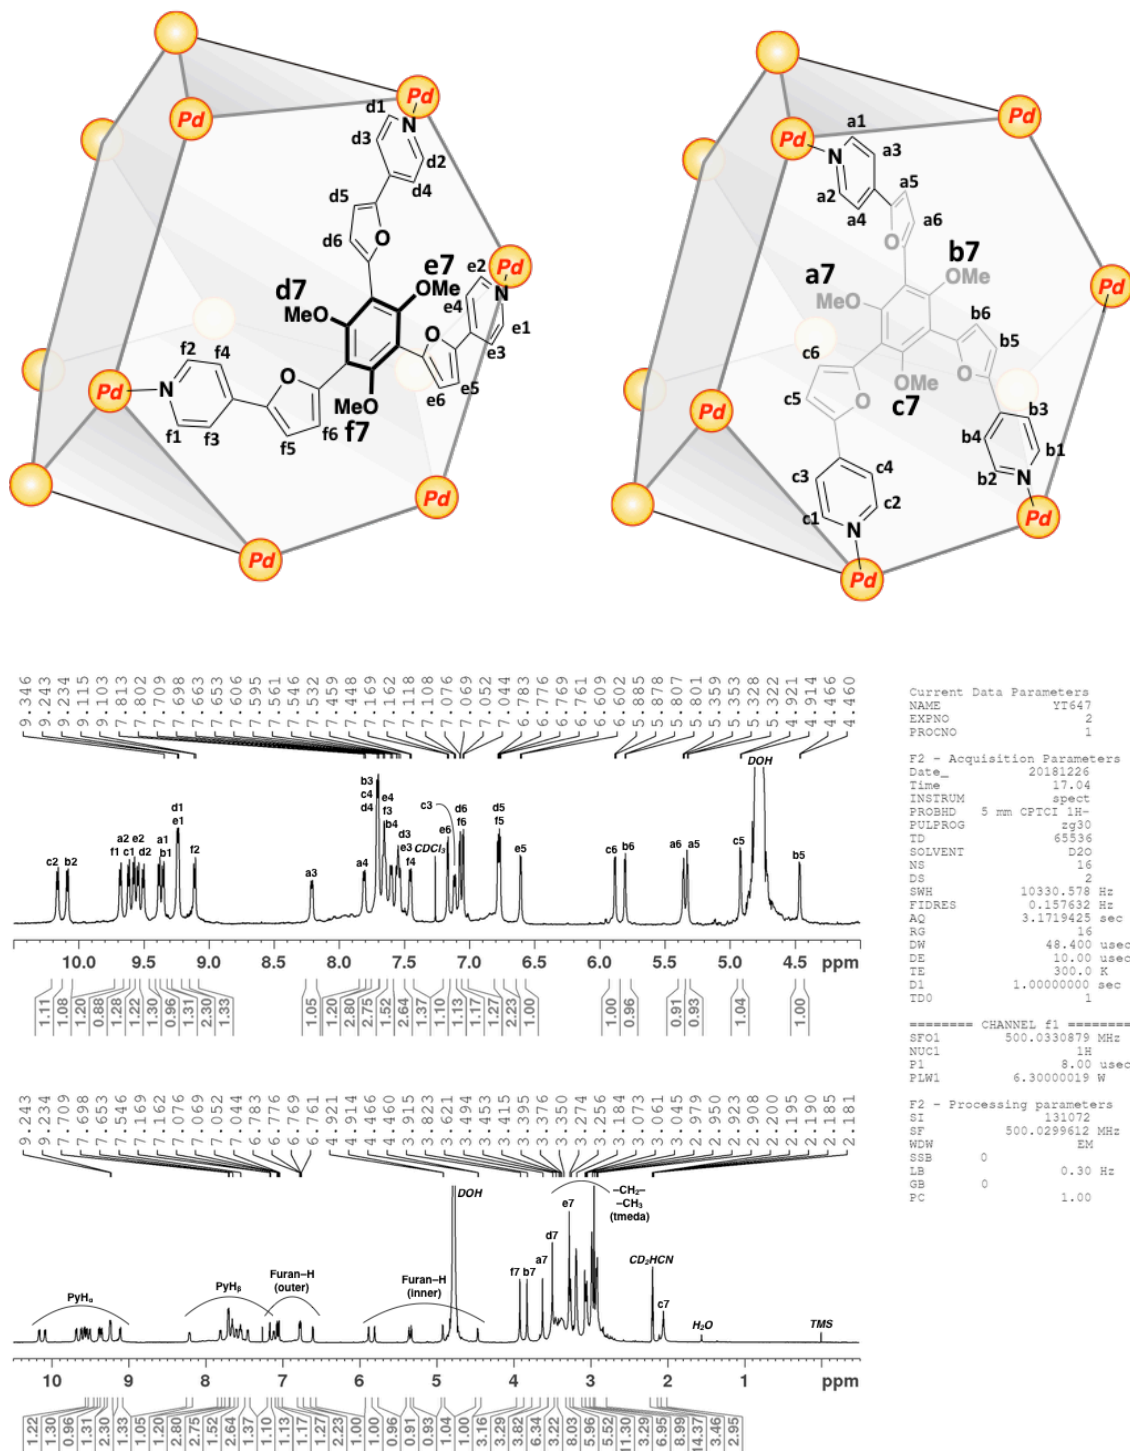

Figure S6.  $^1H$  NMR spectrum (500 MHz, 300 K, acetonitrile- $d_3$ /D $_2$ O (1:4 v/v)) of 1.

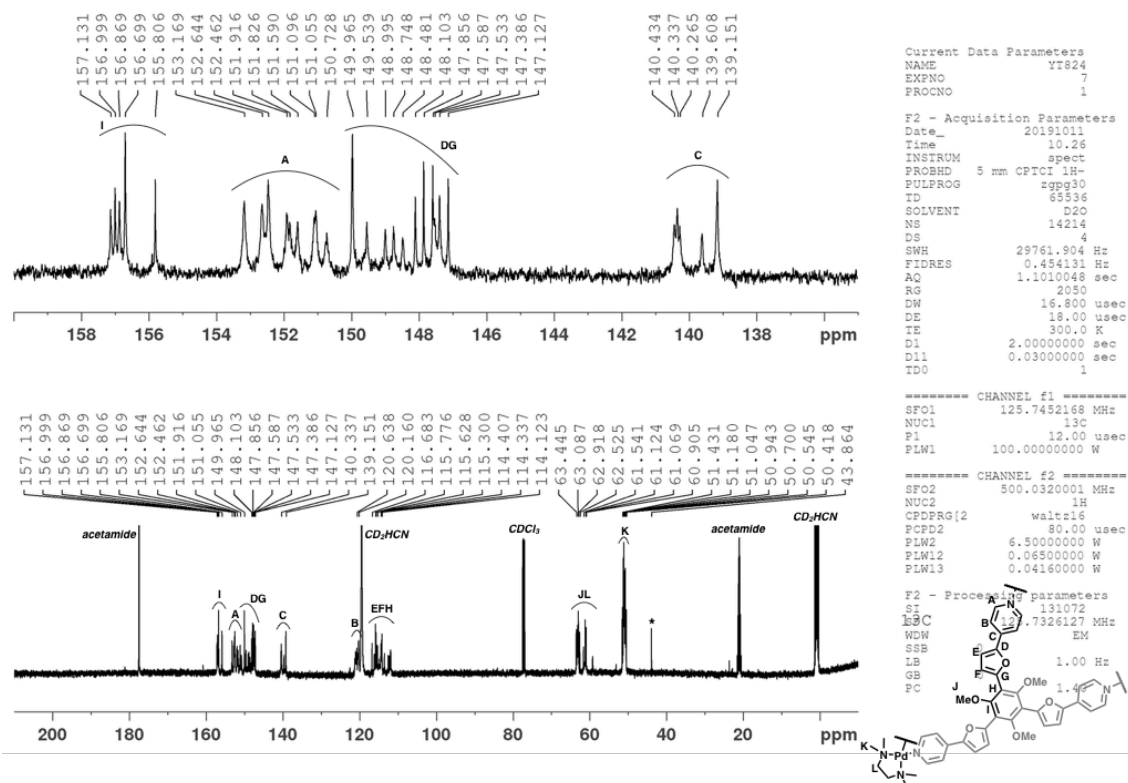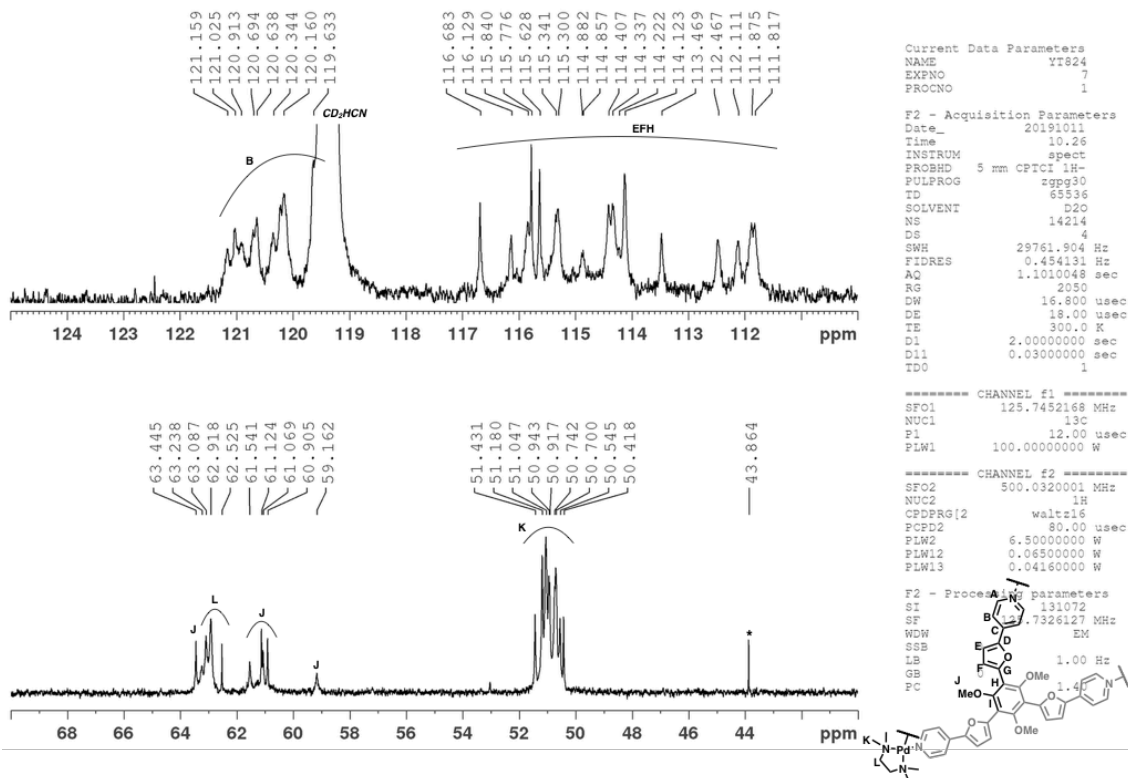

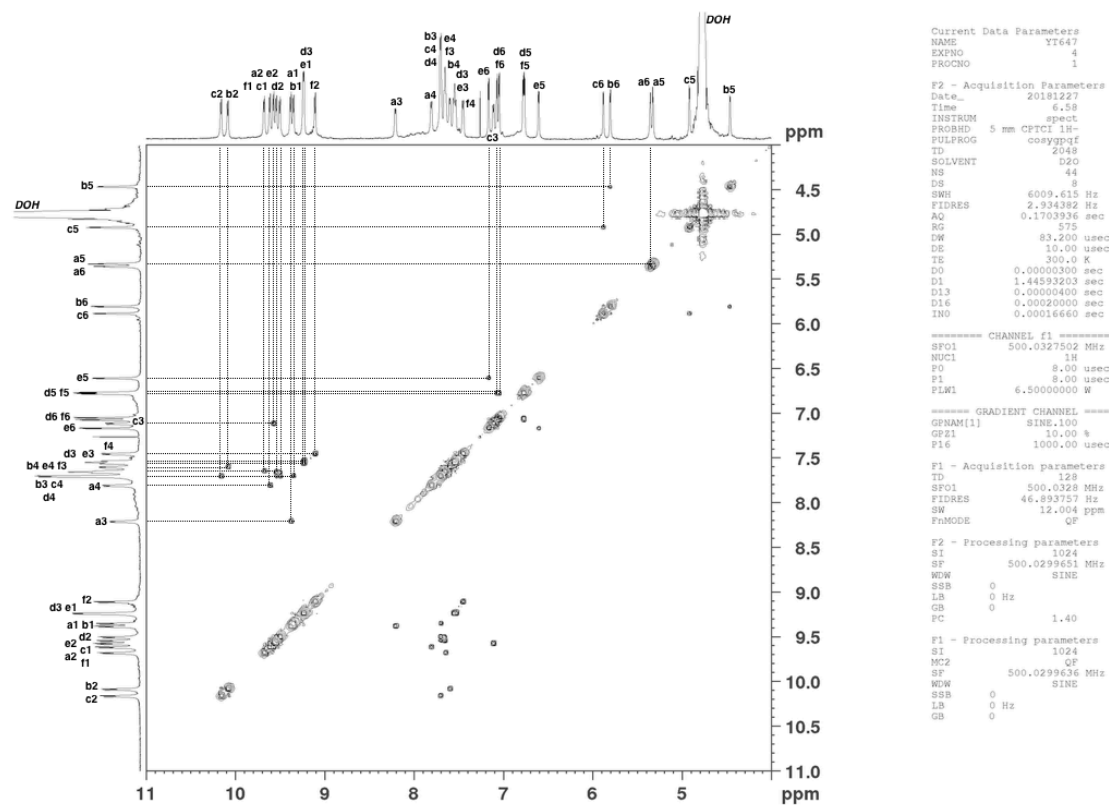

Figure S9.  $^1\text{H}$ - $^1\text{H}$  COSY NMR spectrum (500 MHz, 300 K, acetonitrile- $d_3$ /D $_2$ O (1:4 v/v)) of **1**.

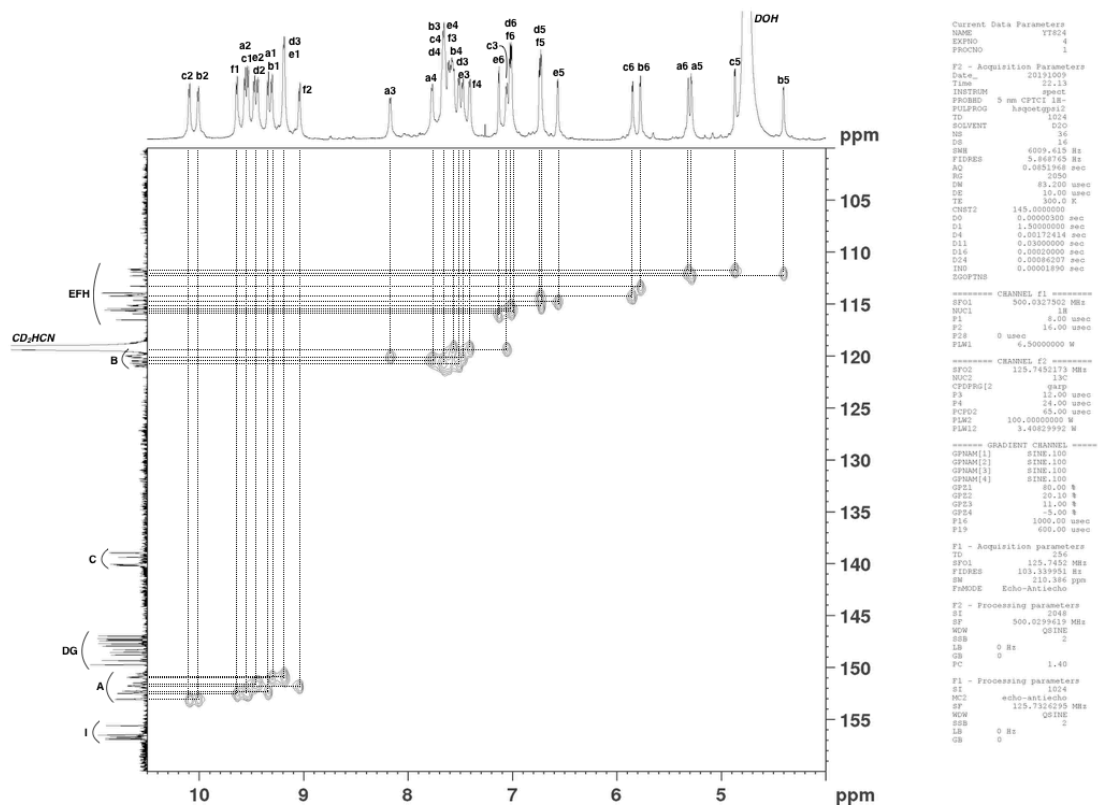

Figure S10.  $^1\text{H}$ - $^{13}\text{C}$  HSQC NMR spectrum (500 MHz, 300 K, acetonitrile- $d_3$ /D $_2$ O (1:4 v/v)) of **1**.

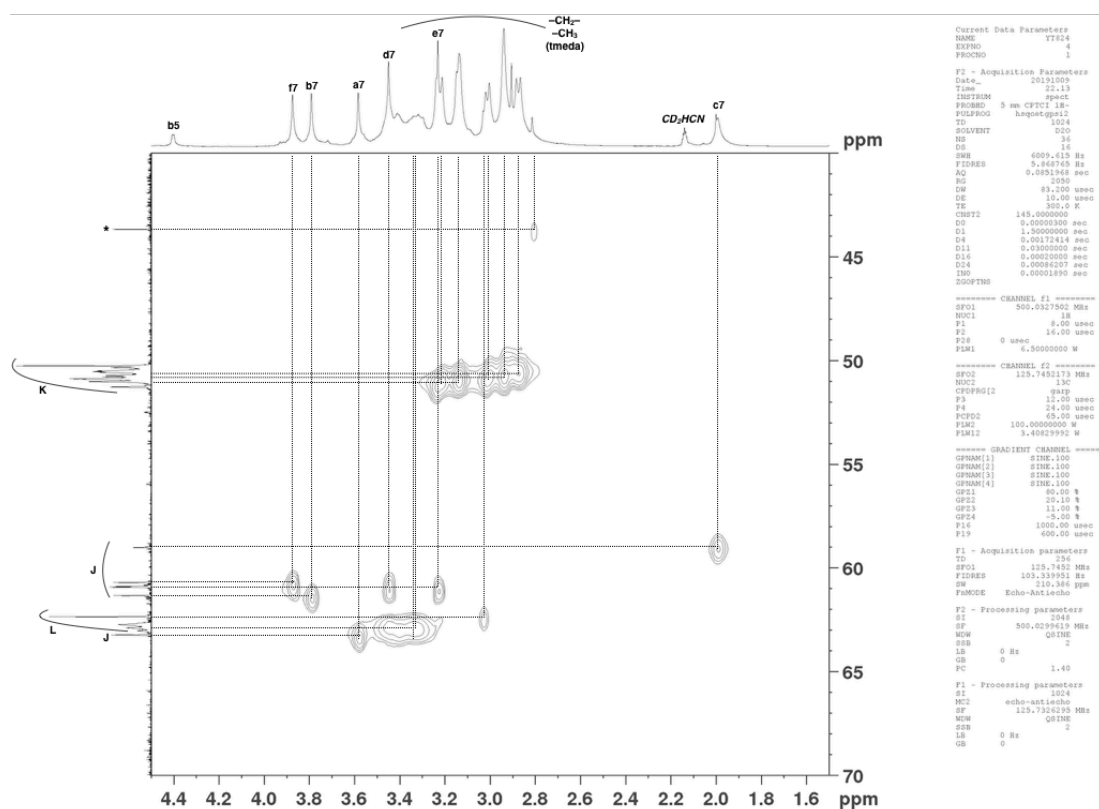

Figure S11.  $^1\text{H}$ - $^{13}\text{C}$  HSQC NMR spectrum (500 MHz, 300 K, acetonitrile- $d_3$ /D $_2$ O (1:4 v/v)) of **1**.

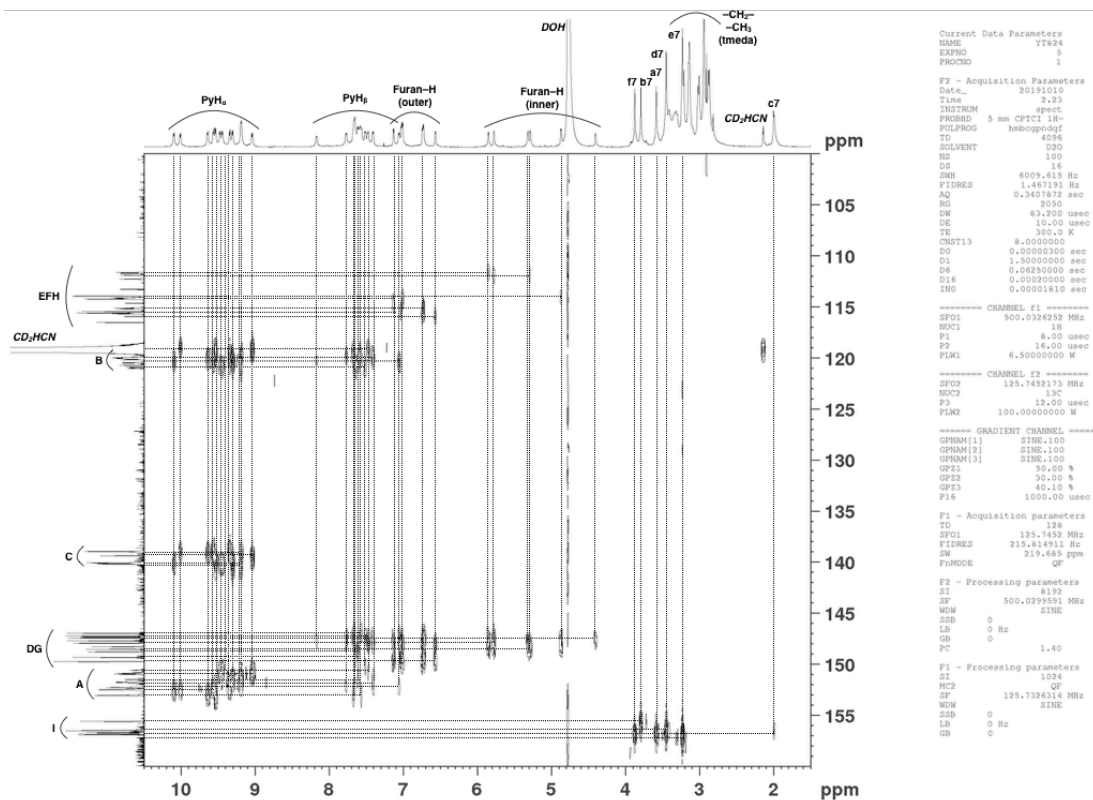

Figure S12.  $^1\text{H}$ - $^{13}\text{C}$  HMBC NMR spectrum (500 MHz, 300 K, acetonitrile- $d_3$ /D $_2$ O (1:4 v/v)) of **1**.



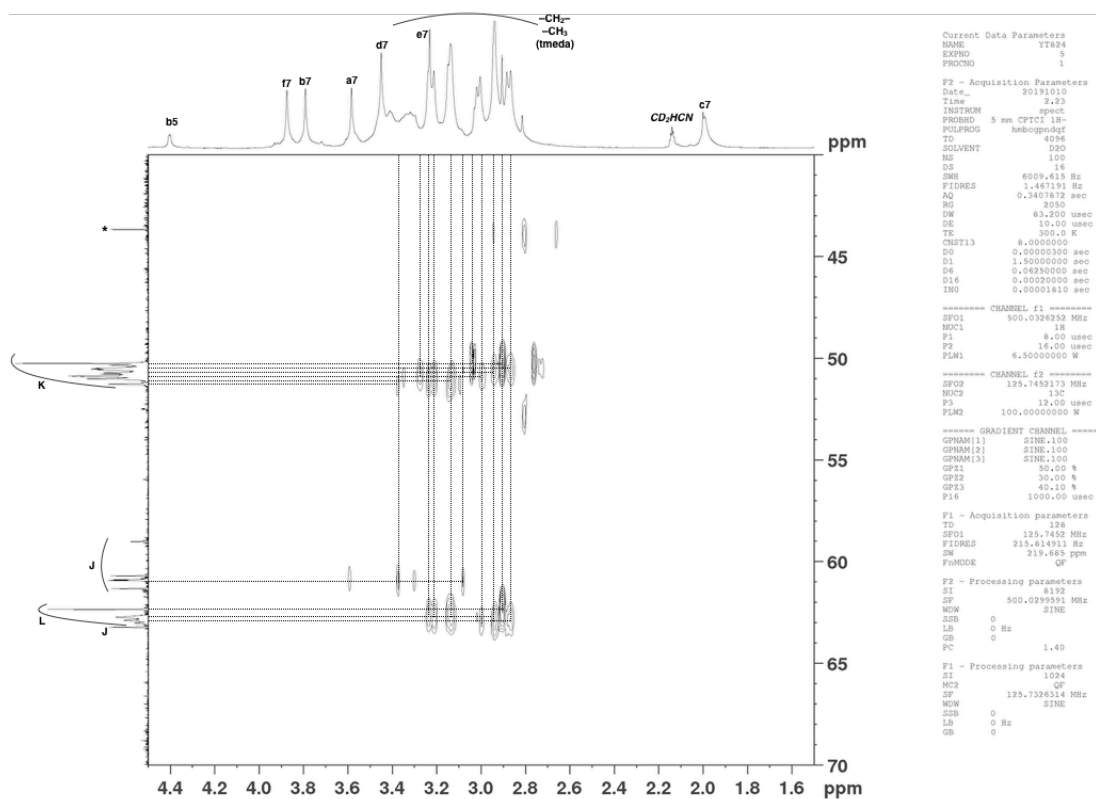

Figure S13.  $^1\text{H}$ - $^{13}\text{C}$  HMBC NMR spectrum (500 MHz, 300 K, acetonitrile- $d_3$ /D $_2$ O (1:4 v/v)) of **1**.

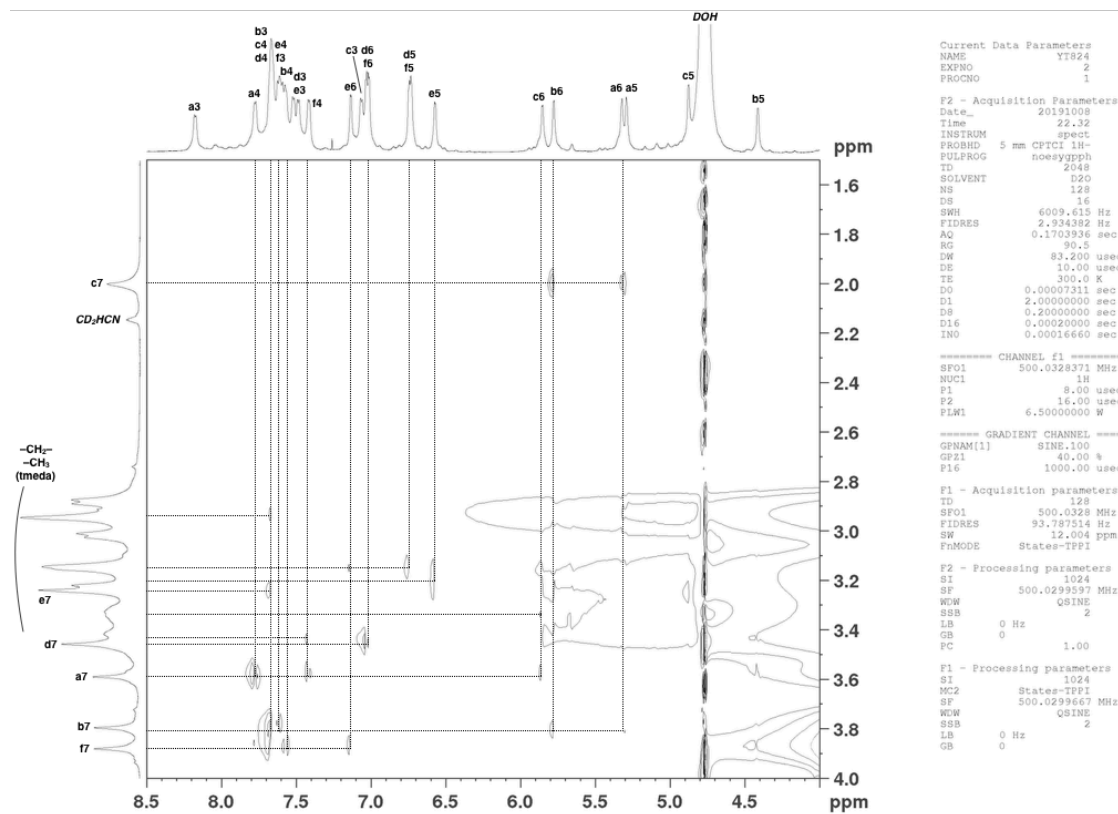

Figure S14.  $^1\text{H}$ - $^1\text{H}$  NOESY NMR spectrum (500 MHz, 300 K, acetonitrile- $d_3$ /D $_2$ O (1:4 v/v)) of **1**.

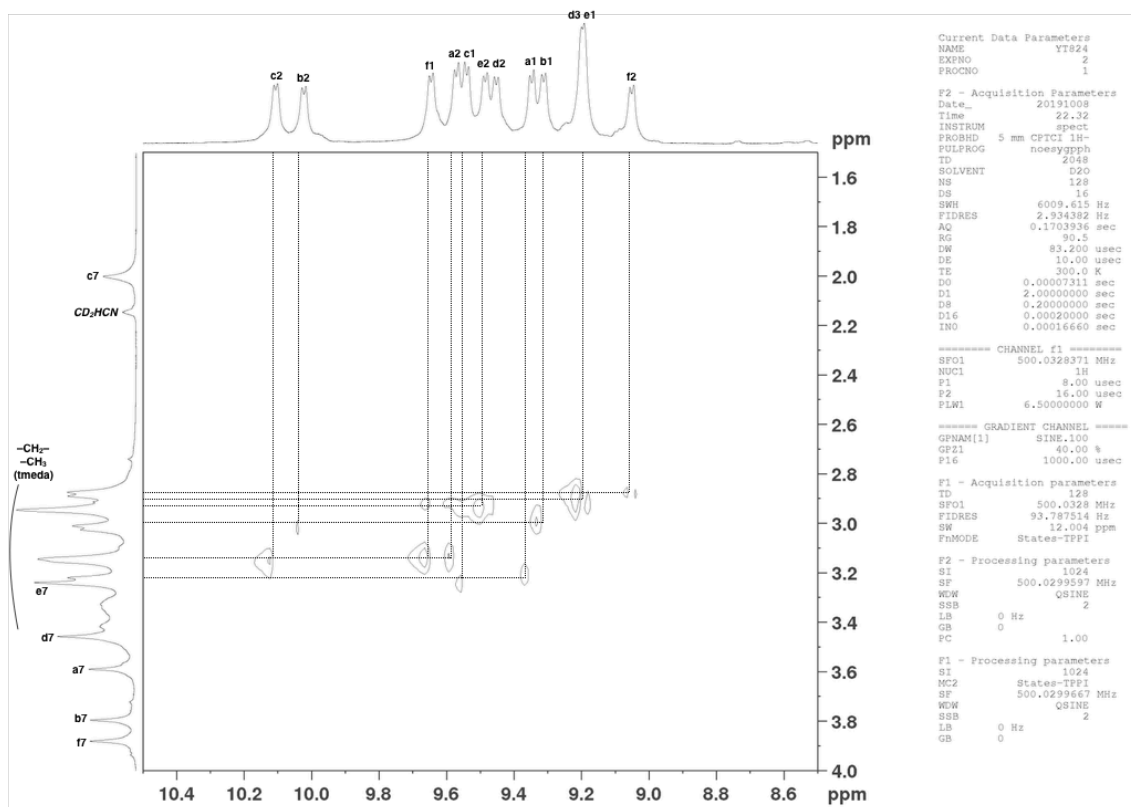

Figure S15.  $^1\text{H}$ - $^1\text{H}$  NOESY NMR spectrum (500 MHz, 300 K, acetonitrile- $d_3$ /D $_2$ O (1:4 v/v)) of **1**.

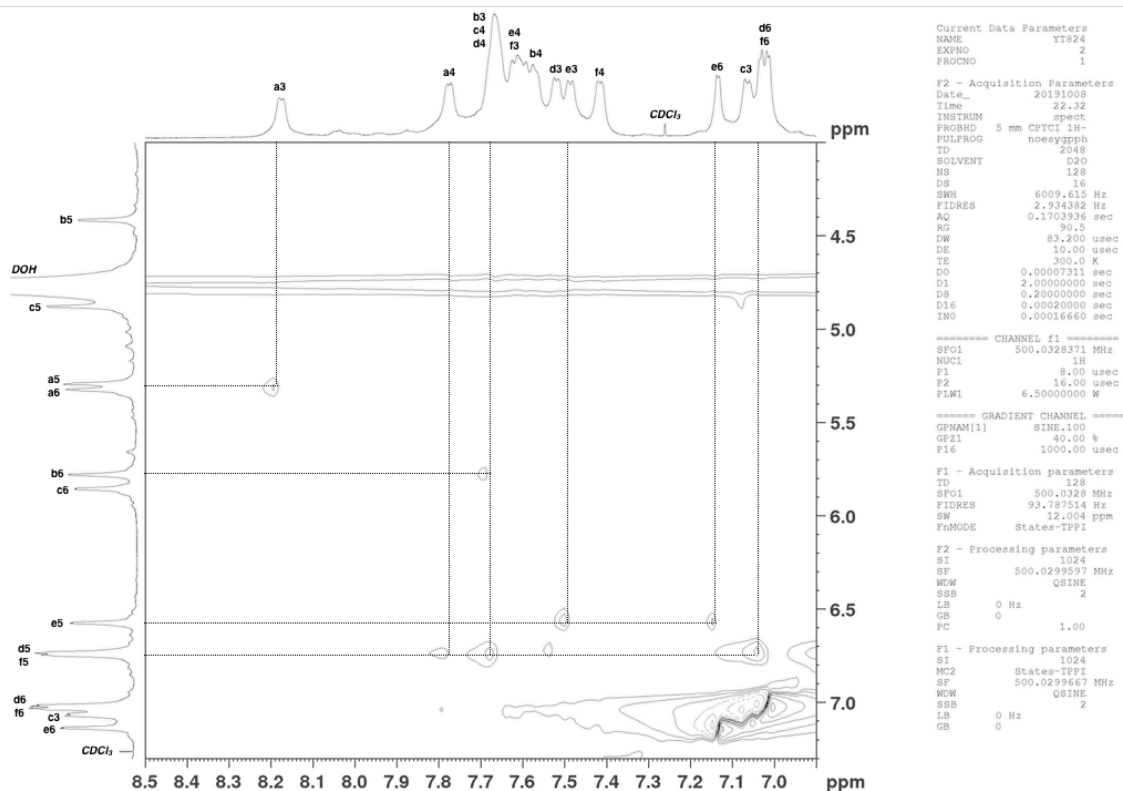

Figure S16.  $^1\text{H}$ - $^1\text{H}$  NOESY NMR spectrum (500 MHz, 300 K, acetonitrile- $d_3$ /D $_2$ O (1:4 v/v)) of **1**.

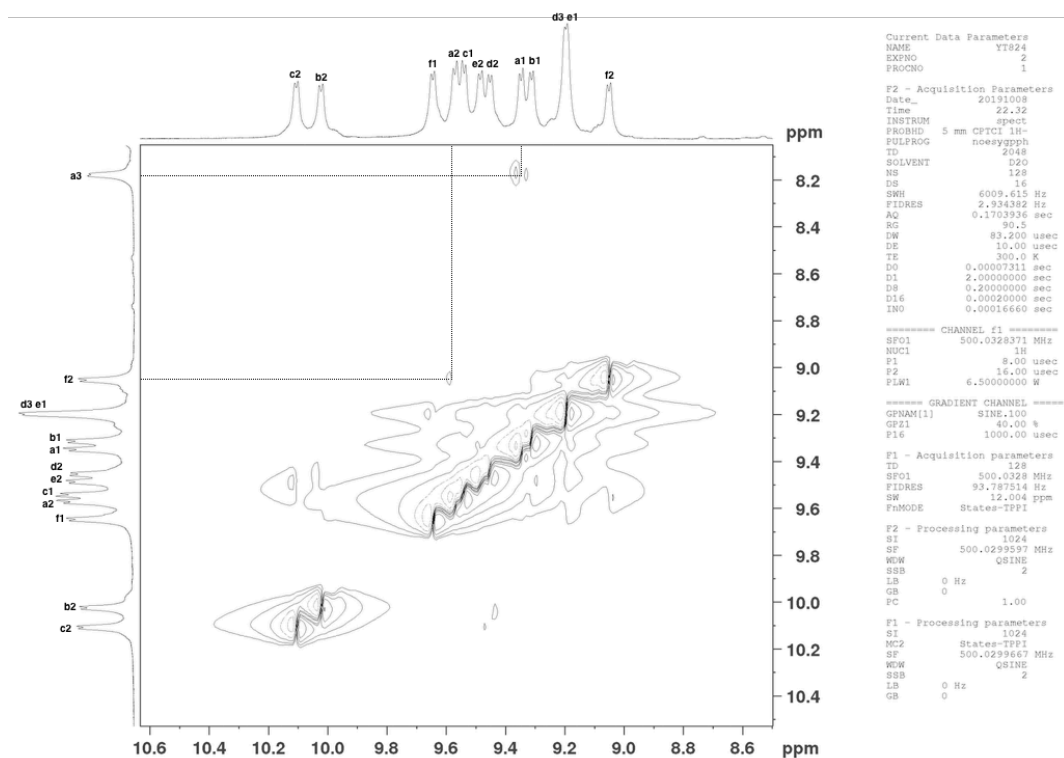

Figure S17.  $^1\text{H}$ - $^1\text{H}$  NOESY NMR spectrum (500 MHz, 300 K, acetonitrile- $d_3$ /D $_2$ O (1:4 v/v)) of **1**.

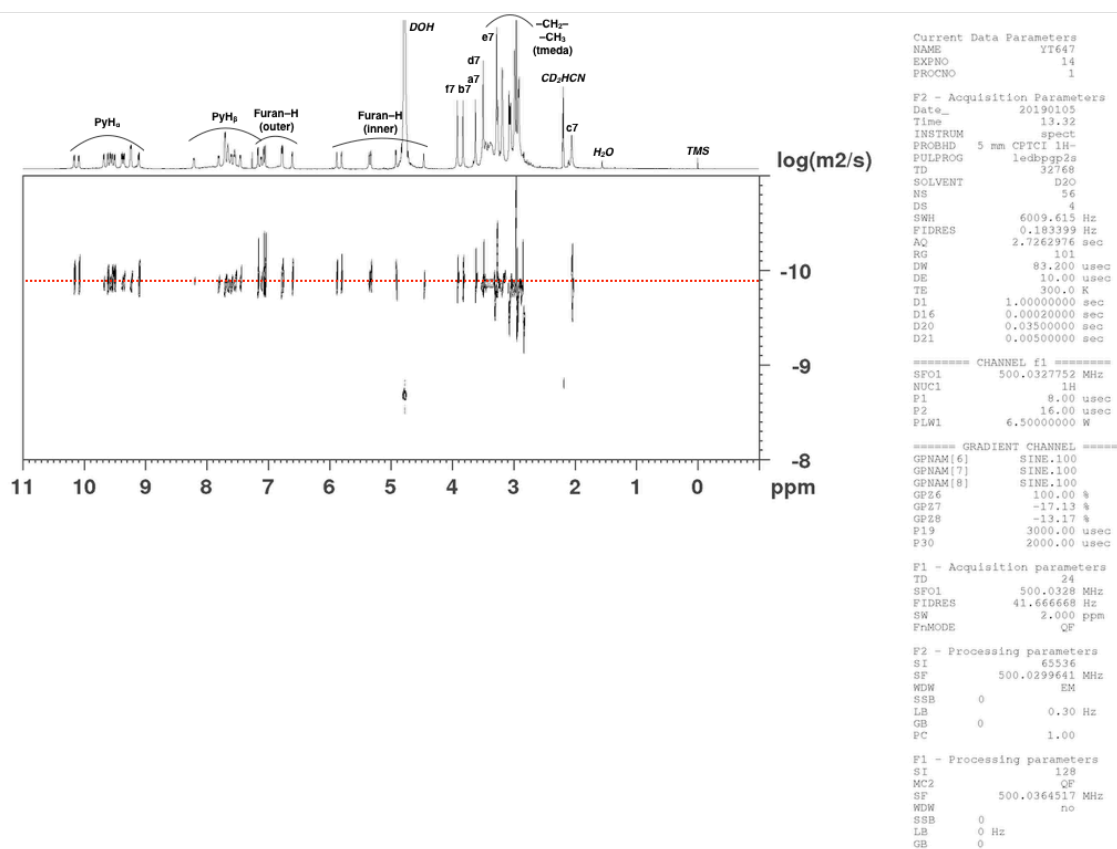

Figure S18.  $^1\text{H}$  DOSY NMR spectrum (500 MHz, 300 K, acetonitrile- $d_3$ /D $_2$ O (1:4 v/v)) of **1**.

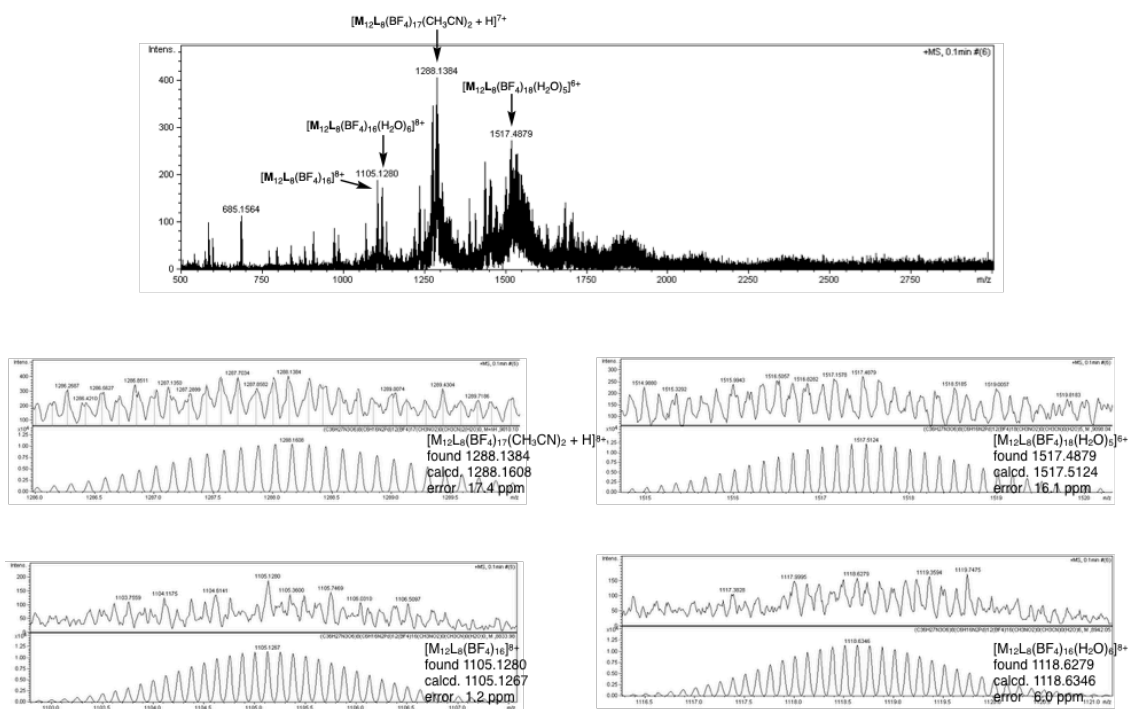

Figure S19. ESI-MS spectra of 1.

## 4. Inclusion experiments

### General procedure

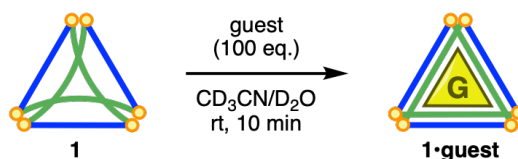

Dried powder of cage **1** (18.0 mg, 2.0  $\mu\text{mol}$ ) was dissolved in acetonitrile- $d_3$ /D<sub>2</sub>O (800  $\mu\text{L}$ , 1:4 v/v). Guest molecule (100 eq.) was added to the solution and stirred at room temperature for 10 min. The formation of the inclusion complex was confirmed by  $^1\text{H}$  NMR spectroscopy. The yields of the inclusion complex were determined by comparison of the integral ratio between the signals from empty cage **1** and the guest included cage **1•G**.

**Physical data of 1•CCl<sub>4</sub>:**  $^1\text{H}$  NMR (acetonitrile- $d_3$ /D<sub>2</sub>O (1:4 v/v), 500 MHz):  $\delta$  10.00 (d,  $J$  = 6.0 Hz, 4H, ArH), 9.90 (d,  $J$  = 6.0 Hz, 4H, ArH), 9.63 (d,  $J$  = 6.0 Hz, 4H, ArH), 9.58 (d,  $J$  = 5.5 Hz, 4H, ArH), 9.50 (d,  $J$  = 5.5 Hz, 4H, ArH), 9.38 (d,  $J$  = 6.0 Hz, 4H, ArH), 9.32 (d,  $J$  = 5.5 Hz, 8H, ArH), 9.30 (d,  $J$  = 5.5 Hz, 4H, ArH), 9.23 (d,  $J$  = 6.0 Hz, 4H, ArH), 9.14 (d,  $J$  = 6.5 Hz, 4H, ArH), 9.03 (d,  $J$  = 6.0 Hz, 4H, ArH), 8.06 (d,  $J$  = 5.0 Hz, 4H, ArH), 7.87 (d,  $J$  = 5.5 Hz, 4H, ArH), 7.76 (d,  $J$  = 5.5 Hz, 4H, ArH), 7.71 (br, 8H, ArH), 7.65 (d,  $J$  = 5.5 Hz, 4H, ArH), 7.56 (d,  $J$  = 5.5 Hz, 8H, ArH), 7.43 (d,  $J$  = 5.5 Hz, 8H, ArH), 7.40 (d,  $J$  = 6.0 Hz, 4H, ArH), 7.26 (d,  $J$  = 3.5 Hz, 4H, ArH), 7.13 (d,  $J$  = 4.0 Hz, 4H, ArH), 7.11 (d,  $J$  = 3.5 Hz, 4H, ArH), 7.06 (d,  $J$  = 5.5 Hz, 4H, ArH), 6.84 (d,  $J$  = 4.0 Hz, 4H, ArH), 6.76 (d,  $J$  = 3.5 Hz, 4H, ArH), 6.69 (d,  $J$  = 3.5 Hz, 4H, ArH), 5.96 (d,  $J$  = 3.5 Hz, 4H, ArH), 5.65 (d,  $J$  = 3.5 Hz, 4H, ArH), 5.32 (d,  $J$  = 3.0 Hz, 4H, ArH), 5.23 (d,  $J$  = 3.5 Hz, 4H, ArH), 5.00 (d,  $J$  = 3.5 Hz, 4H, ArH), 4.05 (s, 12H, -OMe), 3.74 (s, 12H, -OMe), 3.67 (s, 12H, -OMe), 3.50 (s, 12H, -OMe), 3.50–3.27 (br, 40H, -CH<sub>2</sub>-), 3.24 (s, 12H, -OMe), 3.24 (s, 12H, CH<sub>3</sub>), 3.17 (s, 24H, CH<sub>3</sub>), 3.14 (s, 12H, CH<sub>3</sub>), 3.01 (s, 12H, CH<sub>3</sub>), 3.05 (br, 8H, -CH<sub>2</sub>-), 2.99 (s, 12H, CH<sub>3</sub>), 2.92 (s, 24H, CH<sub>3</sub>), 2.90 (s, 36H, CH<sub>3</sub>), 2.86 (s, 12H, CH<sub>3</sub>), 2.65 (s, 12H, -OMe);  $^{13}\text{C}$  NMR (acetonitrile- $d_3$ /D<sub>2</sub>O (1:4 v/v), 125 MHz):  $\delta$  157.2 (C), 157.1 (C), 156.8 (C), 156.7 (C), 156.0 (C), 155.1 (C), 153.0 (CH), 152.7 (CH), 152.6 (CH), 151.9 (CH), 151.7 (CH), 151.1 (CH), 150.6 (CH), 150.2 (C), 150.1 (C), 150.0 (C), 149.9 (C), 149.6 (C), 149.4 (C), 148.0 (C), 148.0 (C), 147.6 (C), 147.2 (C), 147.2 (C), 147.1 (C), 140.6 (C), 140.1 (C), 139.9 (C), 139.3 (C), 139.2 (C), 120.9 (CH), 120.7 (CH), 120.3 (CH), 120.2 (CH), 119.9 (CH), 116.4 (C), 116.2 (CH), 116.0 (C), 115.8 (CH), 115.7 (C), 115.6 (CH), 115.4 (CH), 115.0 (C), 114.8 (CH), 114.6 (CH), 114.5 (C), 113.3 (CH), 112.5 (CH), 112.0 (CH), 111.8 (CH), 96.5 (CCl<sub>4</sub>), 95.7 (CCl<sub>4</sub>), 63.4 (-OMe), 63.1 (-CH<sub>2</sub>-), 62.9 (-CH<sub>2</sub>-), 62.6 (-CH<sub>2</sub>-), 61.1 (-OMe), 61.0 (-OMe), 60.8 (-OMe), 51.5 (CH<sub>3</sub>), 51.2 (CH<sub>3</sub>), 51.1 (CH<sub>3</sub>), 51.1 (CH<sub>3</sub>), 51.0 (CH<sub>3</sub>), 50.8 (CH<sub>3</sub>), 50.7 (CH<sub>3</sub>), 50.6 (CH<sub>3</sub>), 50.5 (CH<sub>3</sub>).

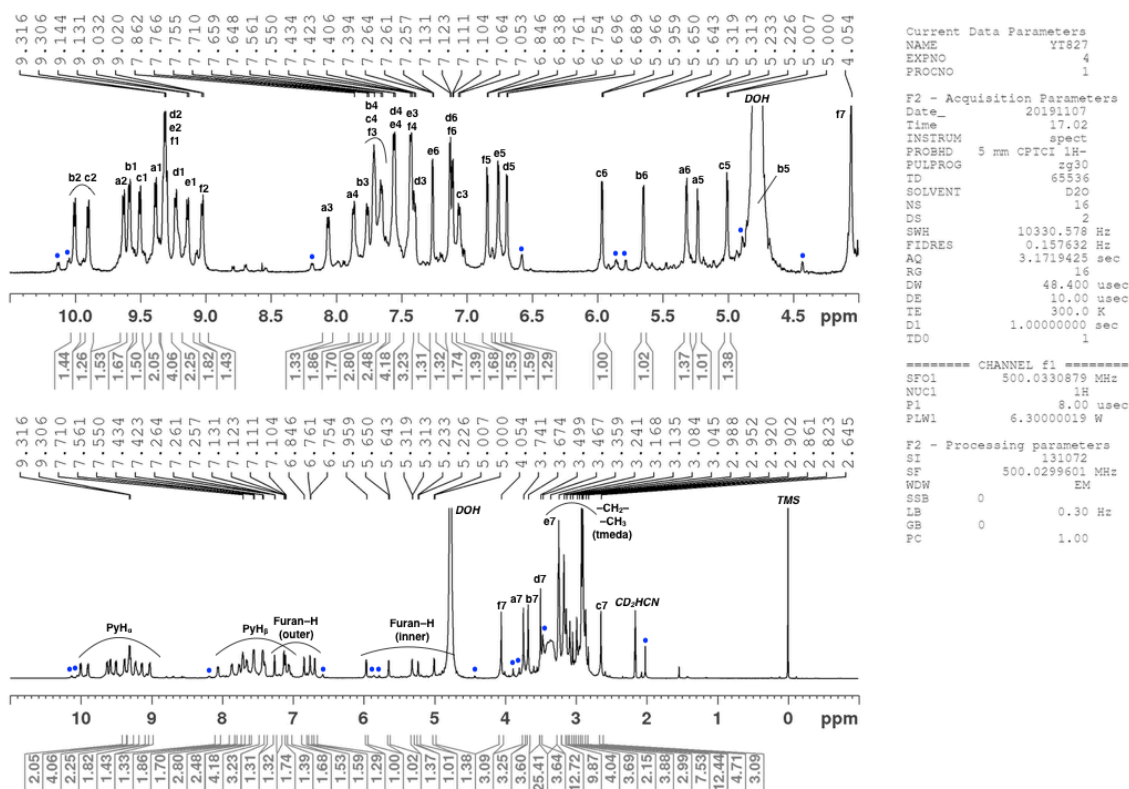

Figure S20.  $^1\text{H}$  NMR spectrum (500 MHz, 300 K, acetonitrile- $d_3$ /D $_2$ O (1:4 v/v)) of  $1\cdot\text{CCl}_4$ .

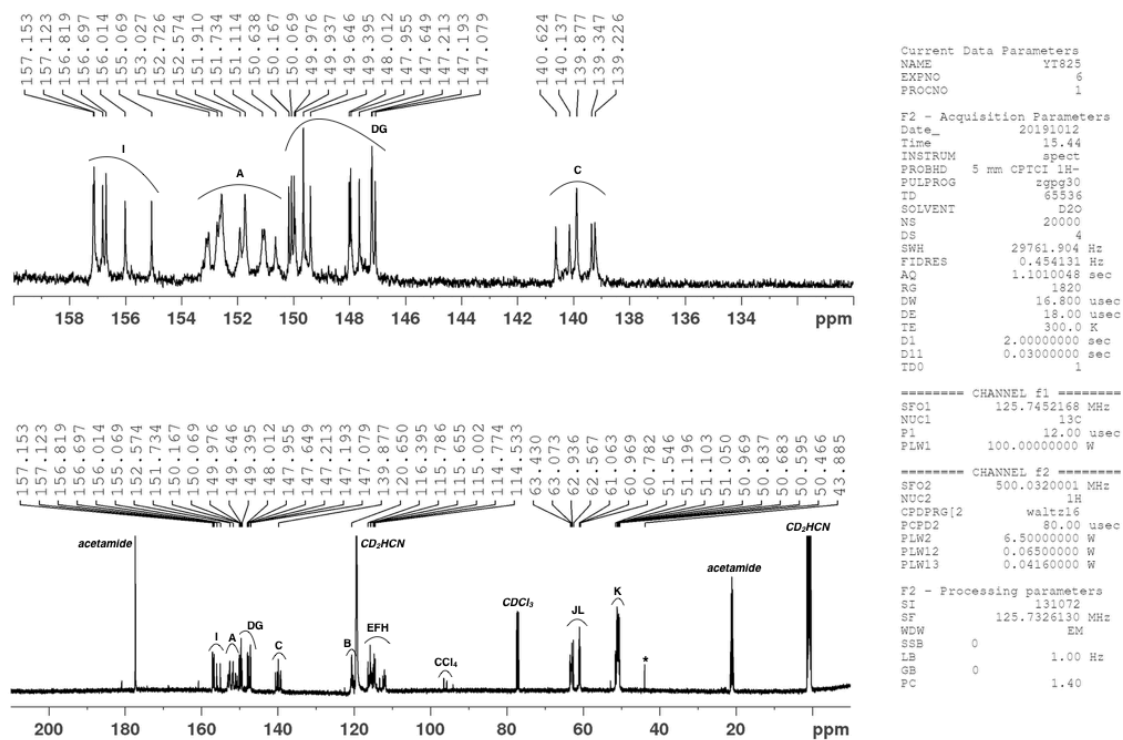

Figure S21.  $^{13}\text{C}$  NMR spectrum (125 MHz, 300 K, acetonitrile- $d_3$ /D $_2$ O (1:4 v/v)) of  $1\cdot\text{CCl}_4$ .

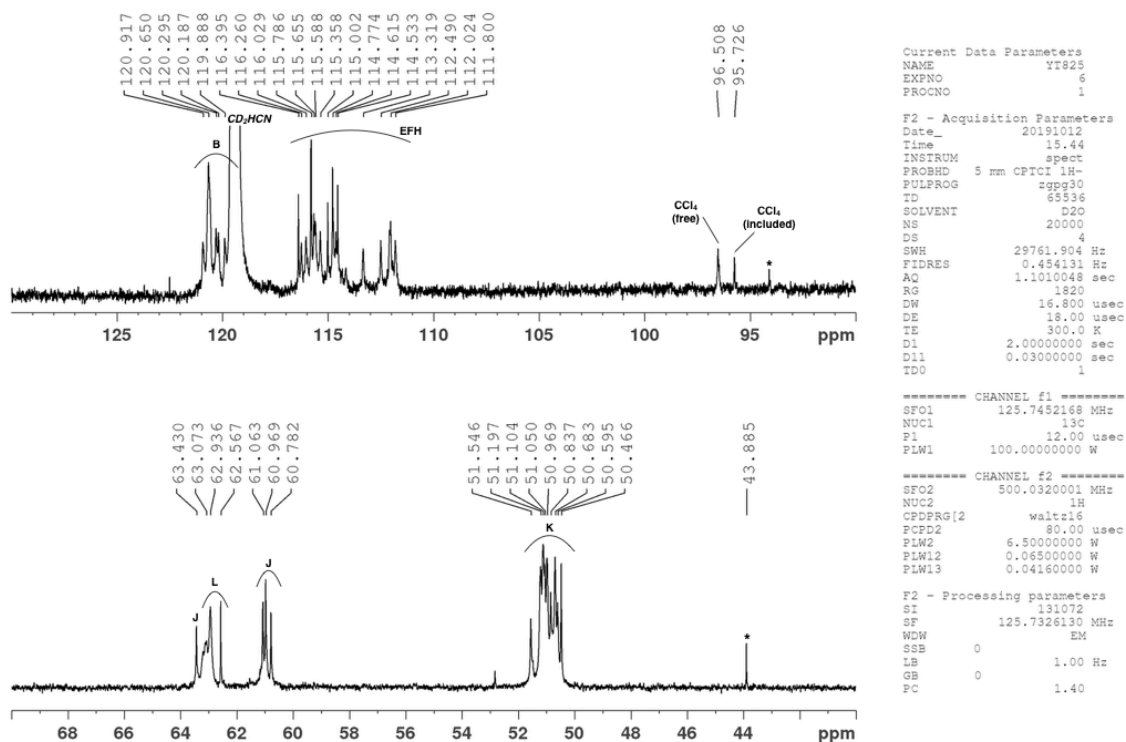

Figure S22.  $^{13}\text{C}$  NMR spectrum (125 MHz, 300 K, acetonitrile- $d_3$ /D $_2$ O (1:4 v/v)) of  $1\cdot\text{CCl}_4$ .

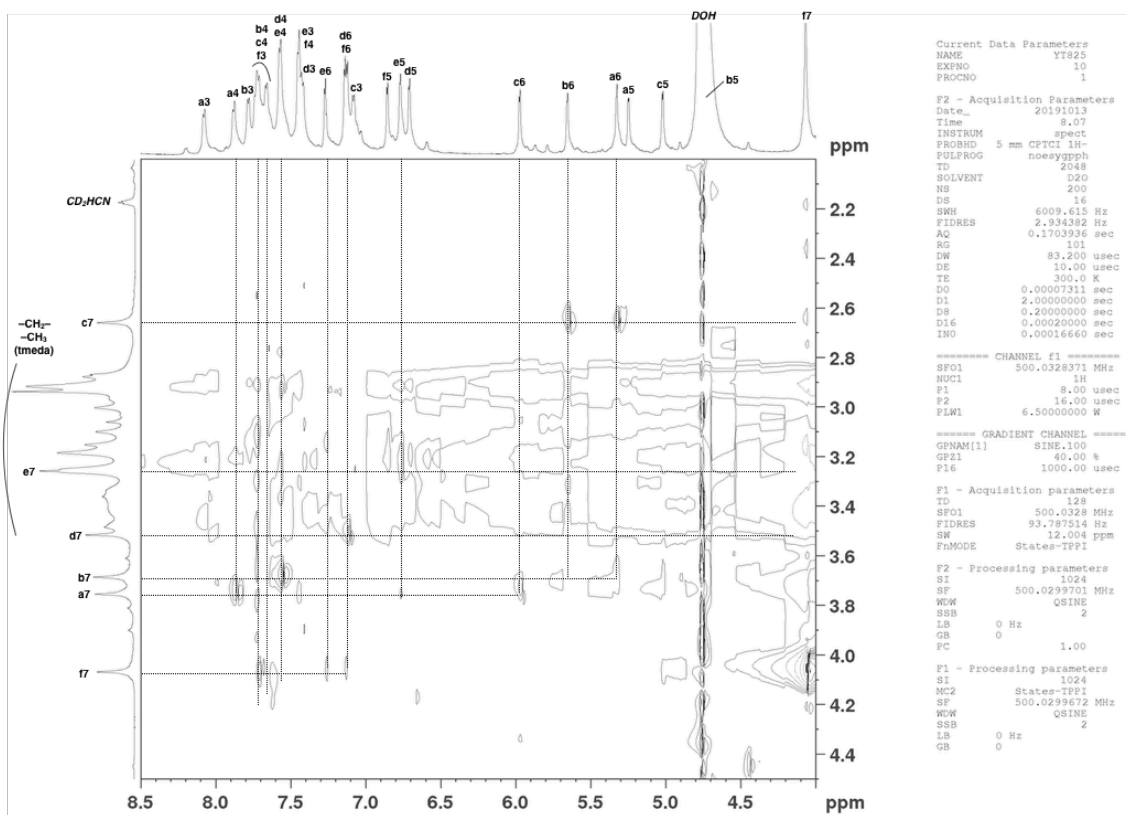

Figure S23.  $^1\text{H}$ - $^1\text{H}$  NOESY NMR spectrum (500 MHz, 300 K, acetonitrile- $d_3$ /D $_2$ O (1:4 v/v)) of  $1\cdot\text{CCl}_4$ .

**Physical data of 1•CBr<sub>4</sub>:** <sup>1</sup>H NMR (acetonitrile-*d*<sub>3</sub>/D<sub>2</sub>O (1:4 v/v), 500 MHz): δ 9.98 (d, *J* = 6.0 Hz, 4H, ArH), 9.87 (d, *J* = 6.0 Hz, 4H, ArH), 9.65 (d, *J* = 6.0 Hz, 4H, ArH), 9.56 (d, *J* = 5.5 Hz, 4H, ArH), 9.48 (d, *J* = 5.5 Hz, 4H, ArH), 9.39 (d, *J* = 5.5 Hz, 4H, ArH), 9.30 (d, *J* = 6.0 Hz, 4H, ArH), 9.29 (d, *J* = 6.0 Hz, 4H, ArH), 9.26 (d, *J* = 6.0 Hz, 4H, ArH), 9.24 (d, *J* = 6.0 Hz, 4H, ArH), 9.11 (d, *J* = 6.0 Hz, 4H, ArH), 9.02 (d, *J* = 6.0 Hz, 4H, ArH), 8.05 (d, *J* = 5.0 Hz, 4H, ArH), 7.90 (d, *J* = 6.0 Hz, 4H, ArH), 7.77 (d, *J* = 5.0 Hz, 4H, ArH), 7.72 (d, *J* = 6.0 Hz, 4H, ArH), 7.72 (d, *J* = 6.0 Hz, 4H, ArH), 7.71 (d, *J* = 6.0 Hz, 4H, ArH), 7.53 (d, *J* = 5.0 Hz, 8H, ArH), 7.43 (d, *J* = 4.5 Hz, 8H, ArH), 7.36 (d, *J* = 5.5 Hz, 4H, ArH), 7.28 (d, *J* = 3.0 Hz, 4H, ArH), 7.15 (d, *J* = 3.5 Hz, 8H, ArH), 7.06 (d, *J* = 5.5 Hz, 4H, ArH), 6.85 (d, *J* = 3.5 Hz, 4H, ArH), 6.79 (d, *J* = 3.0 Hz, 4H, ArH), 6.69 (d, *J* = 3.5 Hz, 4H, ArH), 5.99 (d, *J* = 3.0 Hz, 4H, ArH), 5.65 (d, *J* = 3.0 Hz, 4H, ArH), 5.26 (s, 8H, ArH), 5.01 (d, *J* = 3.5 Hz, 4H, ArH), 4.10 (s, 12H, –OMe), 3.80 (s, 12H, –OMe), 3.62 (s, 12H, –OMe), 3.50 (s, 12H, –OMe), 3.48–3.27 (br, 40H, –CH<sub>2</sub>–), 3.24 (s, 12H, –OMe), 3.23 (s, 12H, CH<sub>3</sub>), 3.17 (s, 24H, CH<sub>3</sub>), 3.14 (s, 12H, CH<sub>3</sub>), 3.09 (s, 12H, CH<sub>3</sub>), 3.04 (br, 8H, –CH<sub>2</sub>–), 2.97 (s, 12H, CH<sub>3</sub>), 2.92 (s, 24H, CH<sub>3</sub>), 2.91 (s, 12H, CH<sub>3</sub>), 2.89 (s, 24H, CH<sub>3</sub>), 2.85 (s, 12H, CH<sub>3</sub>), 2.83 (s, 12H, –OMe); <sup>13</sup>C NMR (acetonitrile-*d*<sub>3</sub>/D<sub>2</sub>O (1:4 v/v), 125 MHz): δ 157.1 (C), 156.8 (C), 156.7 (C), 156.1 (C), 154.8 (C), 153.0 (CH), 152.8 (CH), 152.6 (CH), 152.5 (CH), 151.9 (CH), 151.7 (CH), 151.1 (CH), 150.2 (C), 150.1 (C), 150.0 (C), 149.9 (C), 147.9 (C), 147.7 (C), 147.2 (C), 147.1 (C), 146.9 (C), 140.6 (C), 140.1 (C), 140.0 (C), 139.7 (C), 139.4 (C), 139.3 (C), 120.7 (CH), 120.5 (CH), 120.4 (CH), 120.4 (CH), 120.2 (CH), 119.8 (CH), 116.5 (C), 116.2 (CH), 116.0 (CH), 115.8 (CH), 115.7 (C), 115.5 (CH), 115.3 (C), 115.1 (C), 114.8 (CH), 114.6 (CH), 113.3 (CH), 112.4 (C), 112.0 (CH), 111.8 (C), 63.4 (–OMe), 63.2 (–OMe), 63.1 (–OMe), 62.9 (–OMe), 62.6 (–OMe), 61.2 (–OMe), 61.1 (–OMe), 61.0 (–OMe), 61.0 (–OMe), 60.9 (–OMe), 60.8 (–OMe), 51.5 (CH<sub>3</sub>), 51.2 (CH<sub>3</sub>), 51.1 (CH<sub>3</sub>), 51.0 (CH<sub>3</sub>), 50.9 (CH<sub>3</sub>), 50.9 (CH<sub>3</sub>), 50.7 (CH<sub>3</sub>), 50.6 (CH<sub>3</sub>), 50.5 (CH<sub>3</sub>), –27.5 (CBr<sub>4</sub>), –32.5 (CBr<sub>4</sub>).



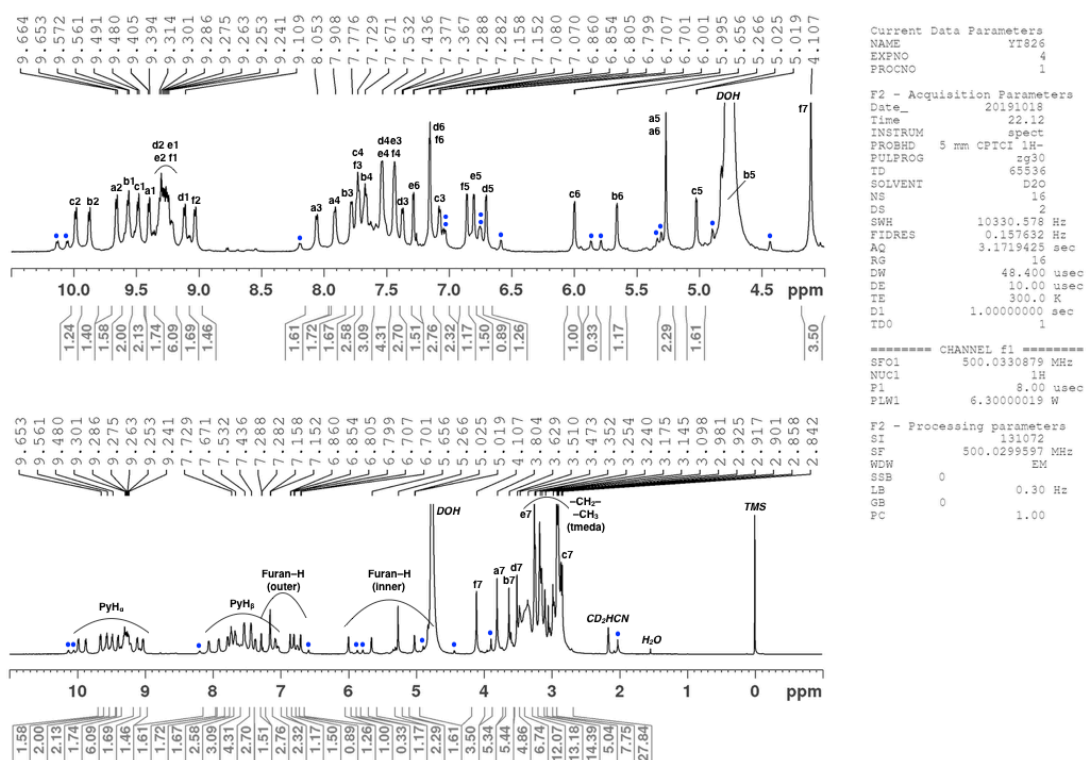

**Figure S24.**  $^1\text{H}$  NMR spectrum (500 MHz, 300 K, acetonitrile- $d_3$ /D $_2$ O (1:4 v/v)) of  $1\cdot\text{CBr}_4$  (signals from empty page 1 are denoted by blue dots).

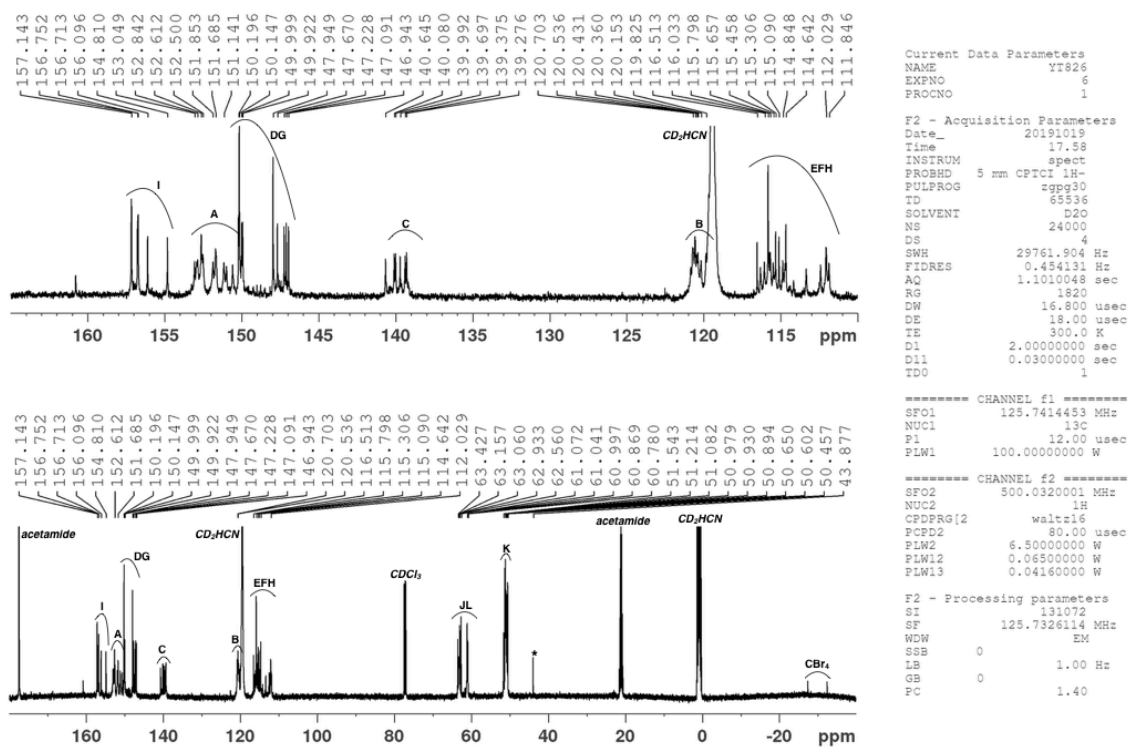

**Figure 25.**  $^{13}\text{C}$  NMR spectrum (125 MHz, 300 K, acetonitrile- $d_3$ /D $_2$ O (1:4 v/v)) of  $1\cdot\text{CBr}_4$  (a signal from impurity is denoted by an asterisk).

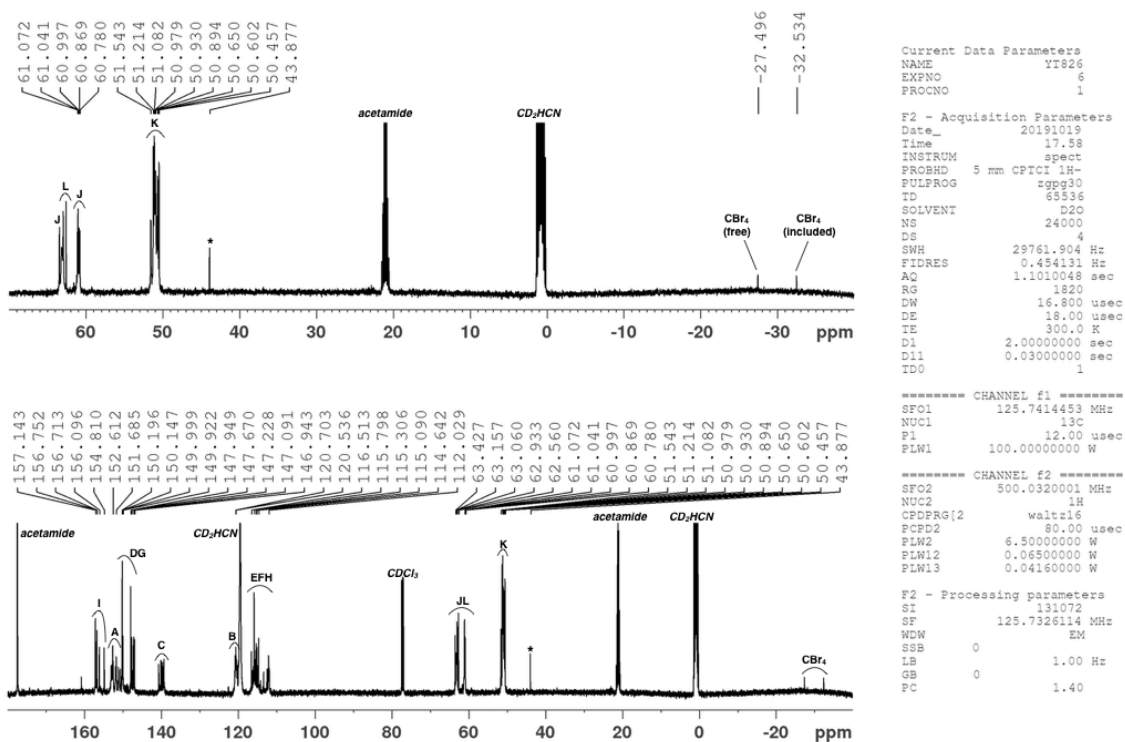

**Figure S26.**  $^{13}\text{C}$  NMR spectrum (125 MHz, 300 K, acetonitrile- $d_3$ /D $_2$ O (1:4 v/v)) of **1•CBr $_4$**  (a signal from impurity is denoted by an asterisk).

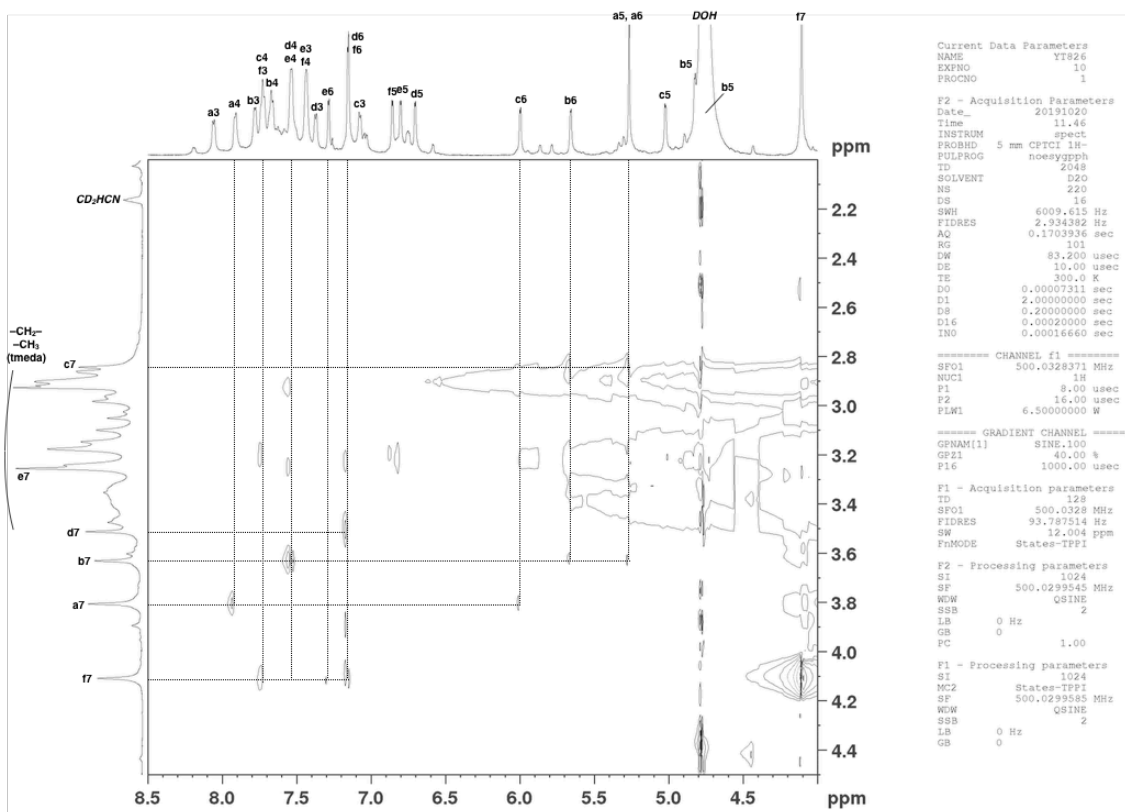

**Figure S27.**  $^1\text{H}$ - $^1\text{H}$  NOESY NMR spectrum (500 MHz, 300 K, acetonitrile- $d_3$ /D $_2$ O (1:4 v/v)) of **1•CBr $_4$** .

**Physical data of 1•CHBr<sub>3</sub>:** <sup>1</sup>H NMR (acetonitrile-*d*<sub>3</sub>/D<sub>2</sub>O (1:4 v/v), 500 MHz): δ 10.05 (d, *J* = 5.0 Hz, 4H, ArH), 9.97 (d, *J* = 5.0 Hz, 4H, ArH), 9.63 (d, *J* = 6.0 Hz, 4H, ArH), 9.61 (d, *J* = 5.0 Hz, 4H, ArH), 9.52 (d, *J* = 5.5 Hz, 4H, ArH), 9.41 (d, *J* = 6.0 Hz, 4H, ArH), 9.39 (d, *J* = 5.5 Hz, 4H, ArH), 9.38 (d, *J* = 5.0 Hz, 4H, ArH), 9.30 (d, *J* = 5.5 Hz, 4H, ArH), 9.26 (d, *J* = 6.0 Hz, 4H, ArH), 9.16 (d, *J* = 5.5 Hz, 4H, ArH), 9.08 (d, *J* = 5.0 Hz, 4H, ArH), 8.06 (d, *J* = 5.0 Hz, 4H, ArH), 7.86 (d, *J* = 5.5 Hz, 4H, ArH), 7.78 (d, *J* = 4.5 Hz, 4H, ArH), 7.71 (d, *J* = 5.5 Hz, 4H, ArH), 7.69 (d, *J* = 5.0 Hz, 4H, ArH), 7.63 (d, *J* = 5.5 Hz, 4H, ArH), 7.59 (br, 8H, ArH), 7.51 (d, *J* = 5.5 Hz, 4H, ArH), 7.45 (d, *J* = 6.0 Hz, 4H, ArH), 7.43 (d, *J* = 6.0 Hz, 4H, ArH), 7.21 (br, 4H, ArH), 7.11 (br, 12H, ArH), 6.82 (d, *J* = 3.0 Hz, 4H, ArH), 6.74 (d, *J* = 3.0 Hz, 4H, ArH), 6.73 (d, *J* = 3.0 Hz, 4H, ArH), 5.94 (br, 4H, ArH), 5.72 (br, 4H, ArH), 5.36 (br, 4H, ArH), 5.21 (br, 4H, ArH), 4.98 (br, 4H, ArH), 4.07 (s, 12H, -OMe), 3.72 (s, 12H, -OMe), 3.71 (s, 12H, -OMe), 3.50 (s, 12H, -OMe), 3.48–3.30 (br, 40H, -CH<sub>2</sub>-), 3.27 (s, 12H, -OMe), 3.23 (s, 12H, CH<sub>3</sub>), 3.16 (s, 24H, CH<sub>3</sub>), 3.14 (s, 12H, CH<sub>3</sub>), 3.07 (s, 12H, CH<sub>3</sub>), 3.04 (s, 12H, CH<sub>3</sub>), 2.99 (br, 8H, -CH<sub>2</sub>-), 2.92 (s, 24H, CH<sub>3</sub>), 2.91 (s, 24H, CH<sub>3</sub>), 2.88 (s, 24H, CH<sub>3</sub>), 2.58 (s, 12H, -OMe).

**Physical data of 1•CH<sub>2</sub>I<sub>2</sub>:** <sup>1</sup>H NMR (acetonitrile-*d*<sub>3</sub>/D<sub>2</sub>O (1:4 v/v), 500 MHz): δ 9.98 (d, *J* = 5.5 Hz, 4H, ArH), 9.91 (d, *J* = 5.5 Hz, 4H, ArH), 9.59 (d, *J* = 5.5 Hz, 8H, ArH), 9.54 (d, *J* = 5.5 Hz, 4H, ArH), 9.52 (d, *J* = 5.0 Hz, 4H, ArH), 9.35 (br, 4H, ArH), 9.33 (d, *J* = 6.0 Hz, 4H, ArH), 9.26 (d, *J* = 6.0 Hz, 4H, ArH), 9.23 (d, *J* = 5.5 Hz, 4H, ArH), 9.12 (d, *J* = 6.0 Hz, 4H, ArH), 9.02 (d, *J* = 5.5 Hz, 4H, ArH), 8.03 (d, *J* = 5.0 Hz, 4H, ArH), 7.83 (d, *J* = 5.5 Hz, 4H, ArH), 7.76 (d, *J* = 6.0 Hz, 4H, ArH), 7.34 (br, 4H, ArH), 7.64 (br, 8H, ArH), 7.56 (br, 12H, ArH), 7.40 (br, 8H, ArH), 7.16 (br, 4H, ArH), 7.08 (br, 12H, ArH), 6.78 (br, 4H, ArH), 6.73 (br, 4H, ArH), 6.69 (br, 4H, ArH), 5.88 (br, 4H, ArH), 5.73 (br, 4H, ArH), 5.34 (br, 4H, ArH), 5.17 (br, 4H, ArH), 4.24 (br, 4H, ArH), 4.05 (br, 4H, ArH), 3.98 (s, 12H, -OMe), 3.72 (s, 12H, -OMe), 3.69 (s, 12H, -OMe), 3.41–3.26 (br, 40H, -CH<sub>2</sub>-), 3.22 (s, 12H, CH<sub>3</sub>), 3.20 (s, 12H, CH<sub>3</sub>), 3.13 (s, 24H, CH<sub>3</sub>), 3.04 (s, 12H, CH<sub>3</sub>), 2.99 (br, 8H, -CH<sub>2</sub>-), 2.97 (s, 12H, CH<sub>3</sub>), 2.93 (s, 12H, CH<sub>3</sub>), 2.89 (s, 36H, CH<sub>3</sub>), 2.85 (s, 24H, CH<sub>3</sub>), 2.46 (s, 12H, -OMe).

Inclusion of CHCl<sub>3</sub>, (CHCl<sub>2</sub>)<sub>2</sub>, and trimethylsilyl acetylene (TMSA) were carried out with 1.25 mM solution of **1** in acetonitrile-*d*<sub>3</sub>/D<sub>2</sub>O (800 μL, 1:4 v/v).

**Physical data of 1•CHCl<sub>3</sub>:** <sup>1</sup>H NMR (acetonitrile-*d*<sub>3</sub>/D<sub>2</sub>O (1:4 v/v), 500 MHz): δ 10.14 (br, 4H, ArH), 10.07 (br, 4H, ArH), 9.65 (d, *J* = 5.0 Hz, 8H, ArH), 9.56 (d, *J* = 5.0 Hz, 4H, ArH), 9.50 (br, 4H, ArH), 9.46 (br, 4H, ArH), 9.40 (d, *J* = 5.0 Hz, 4H, ArH), 9.35 (d, *J* = 5.0 Hz, 4H, ArH), 9.27 (d, *J* = 5.0 Hz, 4H, ArH), 9.22 (br, 4H, ArH), 9.12 (d, *J* = 5.5 Hz, 4H, ArH), 8.14 (br, 4H, ArH), 7.74 (br, 8H, ArH), 7.69 (br, 12H, ArH), 7.64 (br, 8H, ArH), 7.55 (br, 4H, ArH), 7.50 (br, 4H, ArH), 7.46 (br, 4H, ArH), 7.29 (br, 4H, ArH),

7.20 (br, 4H, ArH), 7.14 (d,  $J = 6.5$  Hz, 4H, ArH), 7.10 (br, 4H, ArH), 6.97 (br, 4H, ArH), 5.93 (br, 4H, ArH), 5.75 (br, 4H, ArH), 5.37 (br, 4H, ArH), 5.28 (br, 4H, ArH), 4.99 (br, 4H, ArH), 4.42 (br, 4H, ArH), 3.99 (s, 12H, -OMe), 3.77 (s, 12H, -OMe), 3.68 (s, 12H, -OMe), 3.47–3.32 (br, 40H, -CH<sub>2</sub>-), 3.30 (s, 12H, -OMe), 3.28 (s, 12H, CH<sub>3</sub>), 3.27 (s, 12H, CH<sub>3</sub>), 3.19 (br, 24H, CH<sub>3</sub>), 3.03 (s, 12H, CH<sub>3</sub>), 2.99 (br, 8H, -CH<sub>2</sub>-), 2.83 (s, 36H, CH<sub>3</sub>), 2.47 (br, 12H, -OMe).

**Physical data of 1•(CHCl<sub>3</sub>)<sub>2</sub>:** <sup>1</sup>H NMR (acetonitrile-*d*<sub>3</sub>/D<sub>2</sub>O (1:4 v/v), 500 MHz):  $\delta$  10.02 (d,  $J = 6.0$  Hz, 4H, ArH), 9.94 (d,  $J = 6.0$  Hz, 4H, ArH), 9.65 (d,  $J = 6.0$  Hz, 8H, ArH), 9.59 (d,  $J = 6.0$  Hz, 8H, ArH), 9.51 (d,  $J = 6.5$  Hz, 4H, ArH), 9.40 (d,  $J = 6.0$  Hz, 4H, ArH), 9.30 (d,  $J = 5.5$  Hz, 4H, ArH), 9.27 (d,  $J = 5.5$  Hz, 4H, ArH), 9.14 (d,  $J = 6.0$  Hz, 4H, ArH), 9.08 (d,  $J = 5.5$  Hz, 4H, ArH), 8.05 (d,  $J = 5.0$  Hz, 4H, ArH), 7.89 (d,  $J = 5.5$  Hz, 4H, ArH), 7.80 (d,  $J = 6.5$  Hz, 4H, ArH), 7.71 (d,  $J = 6.0$  Hz, 8H, ArH), 7.56 (br, 12H, ArH), 7.50 (d,  $J = 5.0$  Hz, 4H, ArH), 7.45 (d,  $J = 6.0$  Hz, 4H, ArH), 7.40 (d,  $J = 5.5$  Hz, 4H, ArH), 7.22 (d,  $J = 3.5$  Hz, 4H, ArH), 7.13 (d,  $J = 3.0$  Hz, 12H, ArH), 6.82 (d,  $J = 3.5$  Hz, 4H, ArH), 6.75 (d,  $J = 3.5$  Hz, 4H, ArH), 6.74 (d,  $J = 3.5$  Hz, 4H, ArH), 6.01 (d,  $J = 4.0$  Hz, 4H, ArH), 5.69 (d,  $J = 4.0$  Hz, 4H, ArH), 5.33 (d,  $J = 3.5$  Hz, 4H, ArH), 5.23 (d,  $J = 3.5$  Hz, 4H, ArH), 5.03 (d,  $J = 3.5$  Hz, 4H, ArH), 4.03 (s, 12H, -OMe), 3.74 (s, 12H, -OMe), 3.70 (s, 12H, -OMe), 3.50 (s, 12H, -OMe), 3.44–3.30 (br, 40H, -CH<sub>2</sub>-), 3.26 (s, 12H, -OMe), 3.23 (s, 12H, CH<sub>3</sub>), 3.17 (s, 12H, CH<sub>3</sub>), 3.15 (s, 24H, CH<sub>3</sub>), 3.08 (s, 12H, CH<sub>3</sub>), 3.06 (s, 12H, CH<sub>3</sub>), 2.98 (br, 8H, -CH<sub>2</sub>-), 2.95 (s, 12H, CH<sub>3</sub>), 2.92 (s, 24H, CH<sub>3</sub>), 2.90 (s, 24H, CH<sub>3</sub>), 2.87 (s, 12H, CH<sub>3</sub>), 2.85 (s, 24H, CH<sub>3</sub>), 2.60 (s, 12H, -OMe).

**Physical data of 1•TMSA:** <sup>1</sup>H NMR (acetonitrile-*d*<sub>3</sub>/D<sub>2</sub>O (1:4 v/v), 500 MHz):  $\delta$  10.02 (d,  $J = 6.0$  Hz, 4H, ArH), 9.95 (d,  $J = 6.0$  Hz, 4H, ArH), 9.60 (d,  $J = 5.5$  Hz, 8H, ArH), 9.53 (d,  $J = 5.5$  Hz, 8H, ArH), 9.44 (d,  $J = 6.0$  Hz, 4H, ArH), 9.31 (d,  $J = 5.5$  Hz, 12H, ArH), 9.16 (d,  $J = 6.0$  Hz, 4H, ArH), 9.13 (d,  $J = 6.0$  Hz, 4H, ArH), 8.00 (d,  $J = 5.5$  Hz, 4H, ArH), 7.92 (d,  $J = 5.5$  Hz, 4H, ArH), 7.89 (d,  $J = 5.0$  Hz, 4H, ArH), 7.73 (d,  $J = 6.5$  Hz, 4H, ArH), 7.68 (d,  $J = 6.5$  Hz, 8H, ArH), 7.59 (d,  $J = 4.5$  Hz, 8H, ArH), 7.55 (br, 4H, ArH), 7.52 (d,  $J = 6.0$  Hz, 4H, ArH), 7.41 (d,  $J = 5.0$  Hz, 4H, ArH), 7.23 (d,  $J = 3.5$  Hz, 4H, ArH), 7.20 (d,  $J = 5.0$  Hz, 4H, ArH), 7.15 (d,  $J = 4.5$  Hz, 8H, ArH), 6.85 (d,  $J = 4.0$  Hz, 4H, ArH), 6.81 (d,  $J = 3.5$  Hz, 4H, ArH), 6.76 (d,  $J = 4.0$  Hz, 4H, ArH), 6.07 (d,  $J = 3.5$  Hz, 4H, ArH), 5.70 (d,  $J = 3.0$  Hz, 4H, ArH), 5.42 (d,  $J = 3.5$  Hz, 4H, ArH), 5.19 (br, 4H, ArH), 5.02 (d,  $J = 3.0$  Hz, 4H, ArH), 4.93 (d,  $J = 3.5$  Hz, 4H, ArH), 4.73 (d,  $J = 3.5$  Hz, 4H, ArH), 4.05 (s, 12H, -OMe), 3.69 (s, 12H, -OMe), 3.55 (s, 12H, -OMe), 3.49 (s, 12H, -OMe), 3.44–3.31 (br, 40H, -CH<sub>2</sub>-), 3.28 (s, 12H, -OMe), 3.27 (s, 12H, CH<sub>3</sub>), 3.25 (s, 12H, CH<sub>3</sub>), 3.17 (s, 12H, CH<sub>3</sub>), 3.16 (s, 24H, CH<sub>3</sub>), 3.10 (s, 12H, CH<sub>3</sub>), 3.02 (s, 12H, CH<sub>3</sub>), 2.99 (br, 8H, -CH<sub>2</sub>-), 2.97 (s, 12H, CH<sub>3</sub>), 2.93 (s, 12H, CH<sub>3</sub>), 2.91 (s, 24H, CH<sub>3</sub>), 2.89 (s, 12H, CH<sub>3</sub>), 2.67 (s, 12H, -OMe), -0.61 (s, 1H, CH), -2.35 (s, 9H, CH<sub>3</sub>).

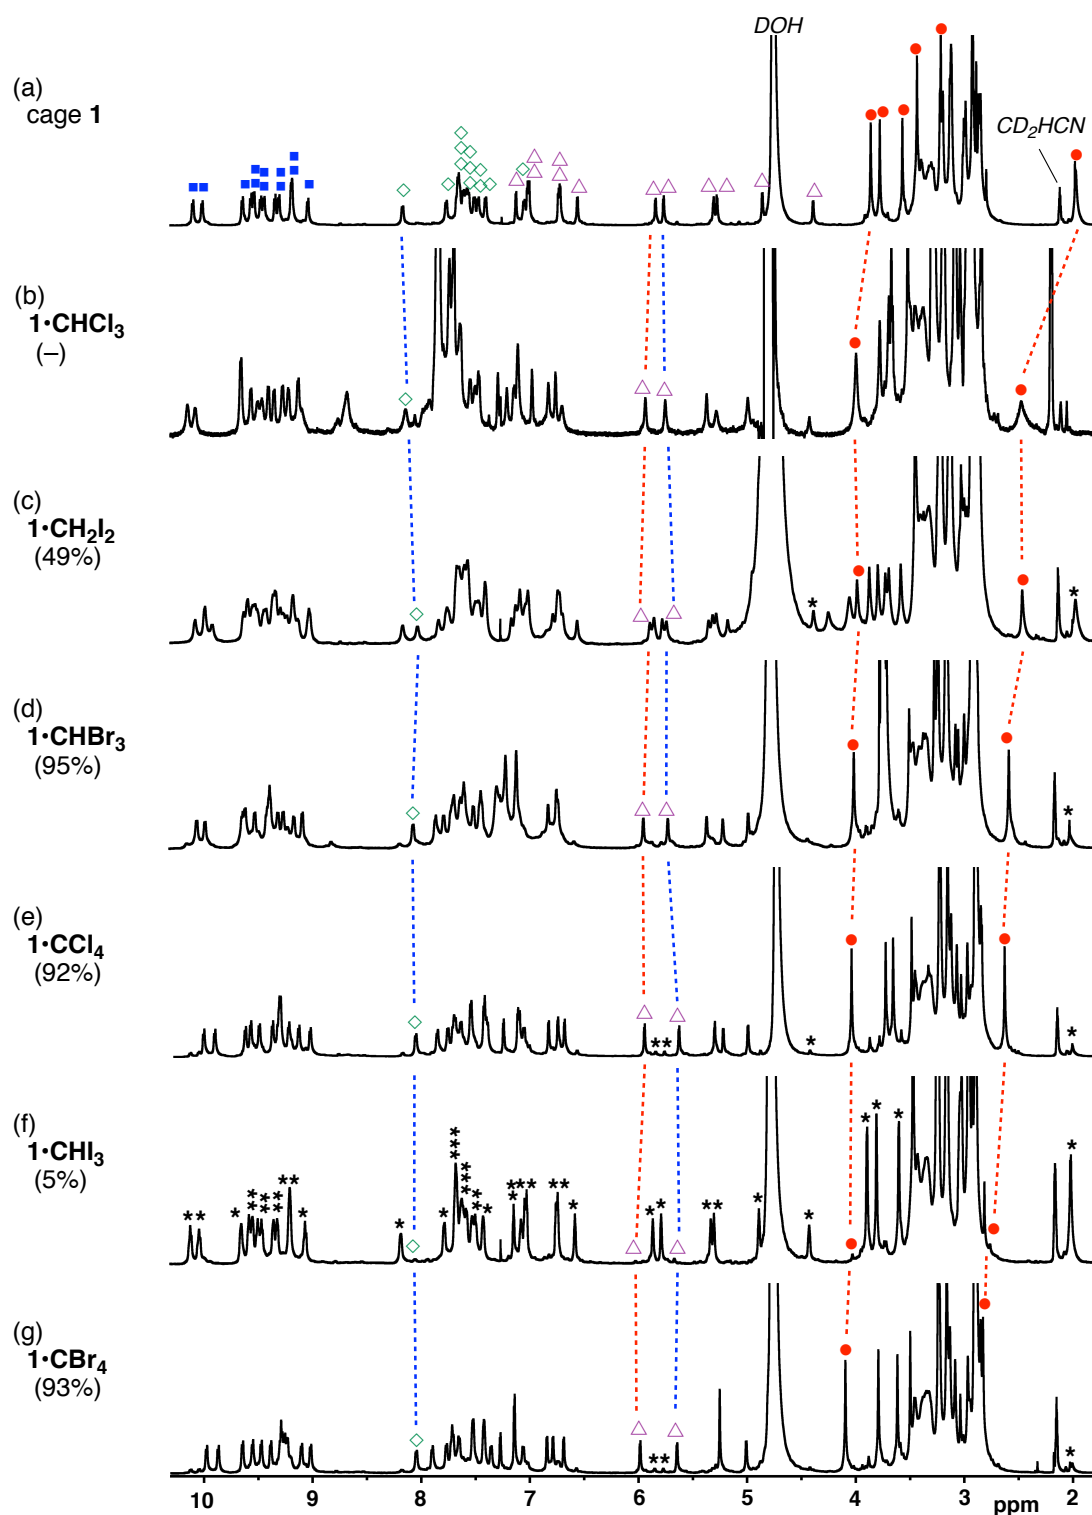

**Figure S28.**  $^1\text{H}$  NMR spectra (500 MHz, 300 K, acetonitrile- $d_3$ / $\text{D}_2\text{O}$  (1:4 v/v)) of (a) **1**, (b) **1**· $\text{CHCl}_3$ , (c) **1**· $\text{CH}_2\text{I}_2$ , (d) **1**· $\text{CHBr}_3$ , (e) **1**· $\text{CCl}_4$ , (f) **1**· $\text{CHI}_3$ , and (g) **1**· $\text{CBr}_4$ . Chloroform and diiodomethane showed fast exchange in acetonitrile- $d_3$ / $\text{D}_2\text{O}$  (1:4 v/v) to show broad signals of the cage.

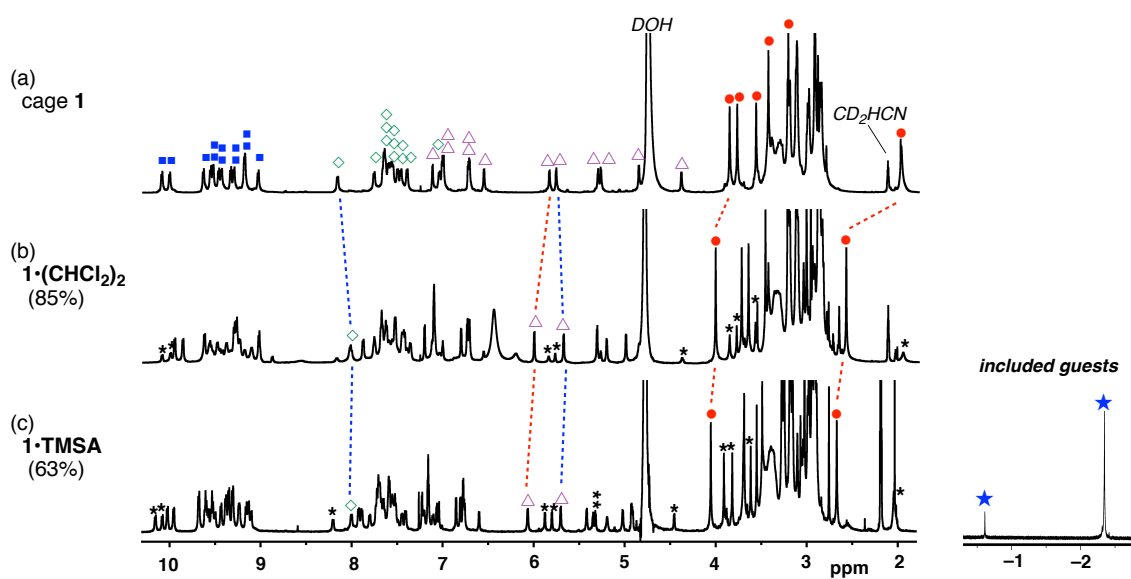

**Figure S29.**  $^1\text{H}$  NMR spectra (500 MHz, 300 K, acetonitrile- $d_3$ /D $_2$ O (1:4 v/v)) of (a) 1, (b) 1•(CHCl $_2$ ) $_2$ , and (c) 1•TMSA.

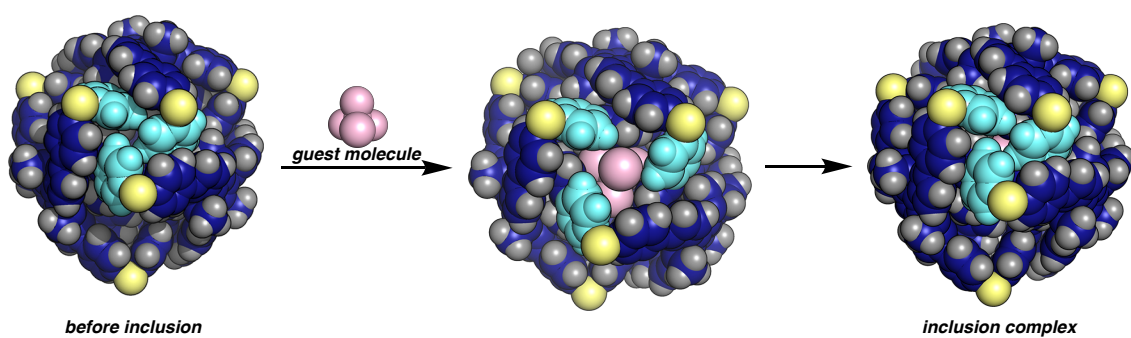

**Figure S30.** Proposed mechanism of inclusion

## Inclusion experiments in D<sub>2</sub>O

### General procedure

Dried powder of cage **1** (18.0 mg, 2.0  $\mu$ mol) was dissolved in D<sub>2</sub>O (800  $\mu$ L). Guest molecule (100 eq.) was added to the solution and stirred at room temperature for 10 min. The formation of the inclusion complex was confirmed by <sup>1</sup>H NMR spectroscopy. The yields of the inclusion complex were determined by comparison of the integral ratio between the signals from empty cage **1** and the guest included cage **1•G**.

**Physical data of 1:** <sup>1</sup>H NMR (D<sub>2</sub>O, 500 MHz):  $\delta$  9.92 (d,  $J$  = 6.0 Hz, 4H, ArH), 9.80 (d,  $J$  = 6.0 Hz, 4H, ArH), 9.57 (d,  $J$  = 6.0 Hz, 4H, ArH), 9.46 (d,  $J$  = 6.0 Hz, 4H, ArH), 9.44 (d,  $J$  = 6.5 Hz, 4H, ArH), 9.29 (d,  $J$  = 6.0 Hz, 4H, ArH), 9.27 (d,  $J$  = 6.5 Hz, 4H, ArH), 9.26 (d,  $J$  = 6.0 Hz, 4H, ArH), 9.22 (d,  $J$  = 6.0 Hz, 4H, ArH), 9.10 (d,  $J$  = 6.0 Hz, 4H, ArH), 9.08 (d,  $J$  = 6.5 Hz, 4H, ArH), 8.87 (d,  $J$  = 6.0 Hz, 4H, ArH), 8.14 (d,  $J$  = 5.0 Hz, 4H, ArH), 7.70 (d,  $J$  = 5.0 Hz, 4H, ArH), 7.63 (d,  $J$  = 5.0 Hz, 4H, ArH), 7.59 (d,  $J$  = 5.0 Hz, 4H, ArH), 7.52 (d,  $J$  = 6.5 Hz, 8H, ArH), 7.51 (d,  $J$  = 5.0 Hz, 4H, ArH), 7.44 (d,  $J$  = 6.0 Hz, 4H, ArH), 7.42 (d,  $J$  = 6.5 Hz, 4H, ArH), 7.33 (d,  $J$  = 5.0 Hz, 4H, ArH), 7.32 (d,  $J$  = 5.0 Hz, 4H, ArH), 7.07 (d,  $J$  = 3.5 Hz, 4H, ArH), 6.94 (d,  $J$  = 4.0 Hz, 4H, ArH), 6.92 (d,  $J$  = 4.0 Hz, 8H, ArH), 6.66 (d,  $J$  = 3.5 Hz, 4H, ArH), 6.64 (d,  $J$  = 3.5 Hz, 4H, ArH), 6.48 (d,  $J$  = 3.5 Hz, 4H, ArH), 5.81 (d,  $J$  = 3.5 Hz, 4H, ArH), 5.75 (d,  $J$  = 3.5 Hz, 4H, ArH), 5.29 (d,  $J$  = 3.5 Hz, 4H, ArH), 5.20 (d,  $J$  = 3.5 Hz, 4H, ArH), 4.76 (d,  $J$  = 3.5 Hz, 4H, ArH), 4.23 (d,  $J$  = 3.5 Hz, 4H, ArH), 3.78 (s, 12H, -OMe), 3.76 (s, 12H, -OMe), 3.51 (s, 12H, -OMe), 3.43–3.21 (br, 40H, -CH<sub>2</sub>-), 3.35 (s, 12H, -OMe), 3.18 (s, 12H, CH<sub>3</sub>), 3.14 (s, 12H, -OMe), 3.13 (s, 12H, CH<sub>3</sub>), 3.08 (br, 8H, -CH<sub>2</sub>-), 3.05 (s, 24H, CH<sub>3</sub>), 2.94 (s, 12H, CH<sub>3</sub>), 2.93 (s, 12H, CH<sub>3</sub>), 2.89 (s, 24H, CH<sub>3</sub>), 2.87 (s, 24H, CH<sub>3</sub>), 2.82 (s, 12H, CH<sub>3</sub>), 2.77 (s, 12H, CH<sub>3</sub>), 1.76 (s, 12H, -OMe).

**Physical data of 1•CCl<sub>4</sub>:** <sup>1</sup>H NMR (D<sub>2</sub>O, 500 MHz): δ 9.77 (d, *J* = 6.0 Hz, 4H, ArH), 9.63 (d, *J* = 5.5 Hz, 4H, ArH), 9.51 (d, *J* = 6.0 Hz, 4H, ArH), 9.49 (d, *J* = 5.5 Hz, 4H, ArH), 9.41 (d, *J* = 5.5 Hz, 4H, ArH), 9.30 (d, *J* = 6.0 Hz, 4H, ArH), 9.20 (d, *J* = 6.0 Hz, 4H, ArH), 9.15 (br, 12H, ArH), 9.02 (d, *J* = 6.0 Hz, 4H, ArH), 8.85 (d, *J* = 6.0 Hz, 4H, ArH), 7.98 (d, *J* = 4.5 Hz, 4H, ArH), 7.80 (d, *J* = 5.0 Hz, 4H, ArH), 7.66 (d, *J* = 5.0 Hz, 4H, ArH), 7.61 (br, 12H, ArH), 7.45 (d, *J* = 5.0 Hz, 8H, ArH), 7.33 (d, *J* = 5.0 Hz, 4H, ArH), 7.27 (d, *J* = 5.0 Hz, 4H, ArH), 7.26 (d, *J* = 5.0 Hz, 4H, ArH), 7.20 (d, *J* = 3.0 Hz, 4H, ArH), 7.05 (d, *J* = 3.0 Hz, 4H, ArH), 6.99 (d, *J* = 3.0 Hz, 4H, ArH), 6.90 (d, *J* = 4.5 Hz, 4H, ArH), 6.76 (d, *J* = 3.0 Hz, 4H, ArH), 6.69 (d, *J* = 3.0 Hz, 4H, ArH), 6.58 (d, *J* = 3.0 Hz, 4H, ArH), 5.91 (d, *J* = 3.5 Hz, 4H, ArH), 5.60 (d, *J* = 2.5 Hz, 4H, ArH), 5.25 (d, *J* = 3.0 Hz, 4H, ArH), 5.14 (d, *J* = 2.5 Hz, 4H, ArH), 4.91 (d, *J* = 3.5 Hz, 4H, ArH), 4.63 (d, *J* = 3.0 Hz, 4H, ArH), 3.98 (s, 12H, -OMe), 3.68 (s, 12H, -OMe), 3.62 (s, 12H, -OMe), 3.39 (s, 12H, -OMe), 3.35–3.20 (br, 40H, -CH<sub>2</sub>-), 3.17 (s, 12H, CH<sub>3</sub>), 3.16 (s, 12H, -OMe), 3.09 (s, 12H, CH<sub>3</sub>), 3.07 (s, 12H, CH<sub>3</sub>), 3.04 (s, 12H, CH<sub>3</sub>), 3.00 (s, 12H, CH<sub>3</sub>), 2.90 (br, 8H, -CH<sub>2</sub>-), 2.84 (s, 12H, CH<sub>3</sub>), 2.83 (s, 12H, CH<sub>3</sub>), 2.81 (s, 36H, CH<sub>3</sub>), 2.78 (s, 24H, CH<sub>3</sub>), 2.58 (s, 12H, -OMe).

**Physical data of 1•CHBr<sub>3</sub>:** <sup>1</sup>H NMR (D<sub>2</sub>O, 500 MHz): δ 9.82 (d, *J* = 6.0 Hz, 4H, ArH), 9.70 (d, *J* = 5.5 Hz, 4H, ArH), 9.52 (d, *J* = 5.5 Hz, 8H, ArH), 9.43 (d, *J* = 6.0 Hz, 4H, ArH), 9.30 (d, *J* = 5.0 Hz, 4H, ArH), 9.20 (d, *J* = 6.0 Hz, 4H, ArH), 9.18 (d, *J* = 5.0 Hz, 8H, ArH), 9.14 (d, *J* = 5.5 Hz, 4H, ArH), 9.04 (d, *J* = 6.0 Hz, 4H, ArH), 8.90 (d, *J* = 5.5 Hz, 4H, ArH), 7.99 (d, *J* = 5.0 Hz, 4H, ArH), 7.80 (d, *J* = 5.0 Hz, 4H, ArH), 7.65 (d, *J* = 6.0 Hz, 4H, ArH), 7.63 (d, *J* = 5.5 Hz, 4H, ArH), 7.59 (d, *J* = 5.5 Hz, 8H, ArH), 7.49 (d, *J* = 5.5 Hz, 4H, ArH), 7.48 (d, *J* = 6.0 Hz, 4H, ArH), 7.35 (d, *J* = 5.0 Hz, 4H, ArH), 7.34 (d, *J* = 6.0 Hz, 4H, ArH), 7.31 (d, *J* = 5.5 Hz, 4H, ArH), 7.15 (d, *J* = 3.5 Hz, 4H, ArH), 7.04 (d, *J* = 3.5 Hz, 4H, ArH), 6.99 (d, *J* = 4.0 Hz, 4H, ArH), 6.97 (d, *J* = 5.5 Hz, 4H, ArH), 6.74 (d, *J* = 3.5 Hz, 4H, ArH), 6.66 (d, *J* = 3.0 Hz, 4H, ArH), 6.64 (d, *J* = 3.5 Hz, 4H, ArH), 5.88 (d, *J* = 3.0 Hz, 4H, ArH), 5.68 (d, *J* = 3.0 Hz, 4H, ArH), 5.30 (d, *J* = 3.5 Hz, 4H, ArH), 5.13 (d, *J* = 3.0 Hz, 4H, ArH), 4.89 (d, *J* = 3.0 Hz, 4H, ArH), 4.63 (d, *J* = 3.5 Hz, 4H, ArH), 3.94 (s, 12H, -OMe), 3.39 (s, 12H, -OMe), 3.38–3.20 (br, 40H, -CH<sub>2</sub>-), 3.17 (s, 12H, CH<sub>3</sub>), 3.16 (s, 12H, -OMe), 3.14 (s, 12H, CH<sub>3</sub>), 3.07 (s, 24H, CH<sub>3</sub>), 3.05 (s, 12H, CH<sub>3</sub>), 3.00 (br, 8H, -CH<sub>2</sub>-), 2.91 (s, 12H, CH<sub>3</sub>), 2.86 (s, 12H, CH<sub>3</sub>), 2.84 (s, 12H, CH<sub>3</sub>), 2.83 (s, 24H, CH<sub>3</sub>), 2.82 (s, 12H, CH<sub>3</sub>), 2.80 (s, 12H, CH<sub>3</sub>), 2.52 (s, 12H, -OMe).



**Physical data of 1•CBr<sub>4</sub>:** <sup>1</sup>H NMR (D<sub>2</sub>O, 500 MHz):  $\delta$  9.85 (d,  $J$  = 6.0 Hz, 4H, ArH), 9.72 (d,  $J$  = 6.0 Hz, 4H, ArH), 9.59 (d,  $J$  = 6.0 Hz, 4H, ArH), 9.51 (d,  $J$  = 5.5 Hz, 4H, ArH), 9.43 (d,  $J$  = 6.0 Hz, 4H, ArH), 9.35 (d,  $J$  = 6.0 Hz, 4H, ArH), 9.24 (d,  $J$  = 6.5 Hz, 4H, ArH), 9.17 (d,  $J$  = 6.0 Hz, 4H, ArH), 9.16 (d,  $J$  = 6.0 Hz, 8H, ArH), 9.04 (d,  $J$  = 6.5 Hz, 4H, ArH), 8.92 (d,  $J$  = 5.5 Hz, 4H, ArH), 8.00 (d,  $J$  = 5.0 Hz, 4H, ArH), 7.87 (d,  $J$  = 4.5 Hz, 4H, ArH), 7.69 (d,  $J$  = 4.5 Hz, 8H, ArH), 7.65 (d,  $J$  = 6.0 Hz, 4H, ArH), 7.63 (d,  $J$  = 6.0 Hz, 4H, ArH), 7.47 (d,  $J$  = 5.0 Hz, 8H, ArH), 7.38 (d,  $J$  = 6.0 Hz, 4H, ArH), 7.33 (d,  $J$  = 5.0 Hz, 4H, ArH), 7.28 (d,  $J$  = 5.5 Hz, 4H, ArH), 7.24 (d,  $J$  = 3.5 Hz, 4H, ArH), 7.10 (d,  $J$  = 4.0 Hz, 4H, ArH), 7.08 (d,  $J$  = 4.0 Hz, 4H, ArH), 6.97 (d,  $J$  = 4.0 Hz, 4H, ArH), 6.81 (d,  $J$  = 3.5 Hz, 4H, ArH), 6.75 (d,  $J$  = 3.5 Hz, 4H, ArH), 6.64 (d,  $J$  = 3.5 Hz, 4H, ArH), 5.97 (d,  $J$  = 3.5 Hz, 4H, ArH), 5.63 (d,  $J$  = 3.0 Hz, 4H, ArH), 5.22 (d,  $J$  = 3.5 Hz, 4H, ArH), 5.20 (d,  $J$  = 3.5 Hz, 4H, ArH), 4.96 (d,  $J$  = 3.5 Hz, 4H, ArH), 4.71 (d,  $J$  = 4.0 Hz, 4H, ArH), 4.06 (s, 12H, -OMe), 3.76 (s, 12H, -OMe), 3.56 (s, 12H, -OMe), 3.44 (s, 12H, -OMe), 3.42–3.23 (br, 40H, -CH<sub>2</sub>-), 3.20 (s, 12H, CH<sub>3</sub>), 3.19 (s, 12H, -OMe), 3.18 (s, 12H, CH<sub>3</sub>), 3.12 (s, 24H, CH<sub>3</sub>), 3.08 (s, 12H, CH<sub>3</sub>), 3.04 (s, 12H, CH<sub>3</sub>), 2.97 (br, 8H, -CH<sub>2</sub>-), 2.93 (s, 24H, CH<sub>3</sub>), 2.86 (s, 48H, CH<sub>3</sub>), 2.80 (s, 12H, -OMe).

**Physical data of 1•CH<sub>2</sub>I<sub>2</sub>:** <sup>1</sup>H NMR (D<sub>2</sub>O, 500 MHz):  $\delta$  9.80 (d,  $J$  = 5.5 Hz, 4H, ArH), 9.71 (d,  $J$  = 6.0 Hz, 4H, ArH), 9.52 (d,  $J$  = 5.5 Hz, 4H, ArH), 9.50 (d,  $J$  = 6.5 Hz, 4H, ArH), 9.43 (d,  $J$  = 6.5 Hz, 4H, ArH), 9.30 (d,  $J$  = 5.5 Hz, 4H, ArH), 9.18 (d,  $J$  = 5.5 Hz, 12H, ArH), 9.14 (d,  $J$  = 5.5 Hz, 4H, ArH), 9.03 (d,  $J$  = 6.0 Hz, 4H, ArH), 8.90 (d,  $J$  = 6.0 Hz, 4H, ArH), 7.98 (d,  $J$  = 5.5 Hz, 4H, ArH), 7.79 (d,  $J$  = 5.0 Hz, 4H, ArH), 7.63 (d,  $J$  = 5.5 Hz, 8H, ArH), 7.56 (d,  $J$  = 6.5 Hz, 8H, ArH), 7.50 (d,  $J$  = 7.0 Hz, 8H, ArH), 7.48 (d,  $J$  = 7.0 Hz, 4H, ArH), 7.36 (d,  $J$  = 6.0 Hz, 4H, ArH), 7.31 (d,  $J$  = 6.5 Hz, 4H, ArH), 7.13 (d,  $J$  = 3.5 Hz, 4H, ArH), 7.03 (d,  $J$  = 3.5 Hz, 4H, ArH), 7.00 (d,  $J$  = 3.0 Hz, 8H, ArH), 6.72 (d,  $J$  = 3.0 Hz, 4H, ArH), 6.66 (d,  $J$  = 3.0 Hz, 4H, ArH), 6.64 (d,  $J$  = 3.0 Hz, 4H, ArH), 5.84 (d,  $J$  = 3.0 Hz, 4H, ArH), 5.70 (d,  $J$  = 3.0 Hz, 4H, ArH), 5.29 (br, 4H, ArH), 5.12 (d,  $J$  = 3.0 Hz, 4H, ArH), 4.88 (d,  $J$  = 3.0 Hz, 4H, ArH), 4.66 (d,  $J$  = 3.0 Hz, 4H, ArH), 3.92 (s, 12H, -OMe), 3.67 (s, 12H, -OMe), 3.64 (s, 12H, -OMe), 3.47 (s, 12H, -OMe), 3.33–3.21 (br, 40H, -CH<sub>2</sub>-), 3.16 (s, 12H, -OMe), 3.16 (s, 12H, CH<sub>3</sub>), 3.13 (s, 12H, CH<sub>3</sub>), 3.06 (s, 24H, CH<sub>3</sub>), 3.04 (s, 24H, CH<sub>3</sub>), 2.97 (br, 8H, -CH<sub>2</sub>-), 2.90 (s, 12H, CH<sub>3</sub>), 2.85 (s, 12H, CH<sub>3</sub>), 2.83 (s, 12H, CH<sub>3</sub>), 2.81 (s, 12H, CH<sub>3</sub>), 2.79 (s, 24H, CH<sub>3</sub>), 2.41 (s, 12H, -OMe).

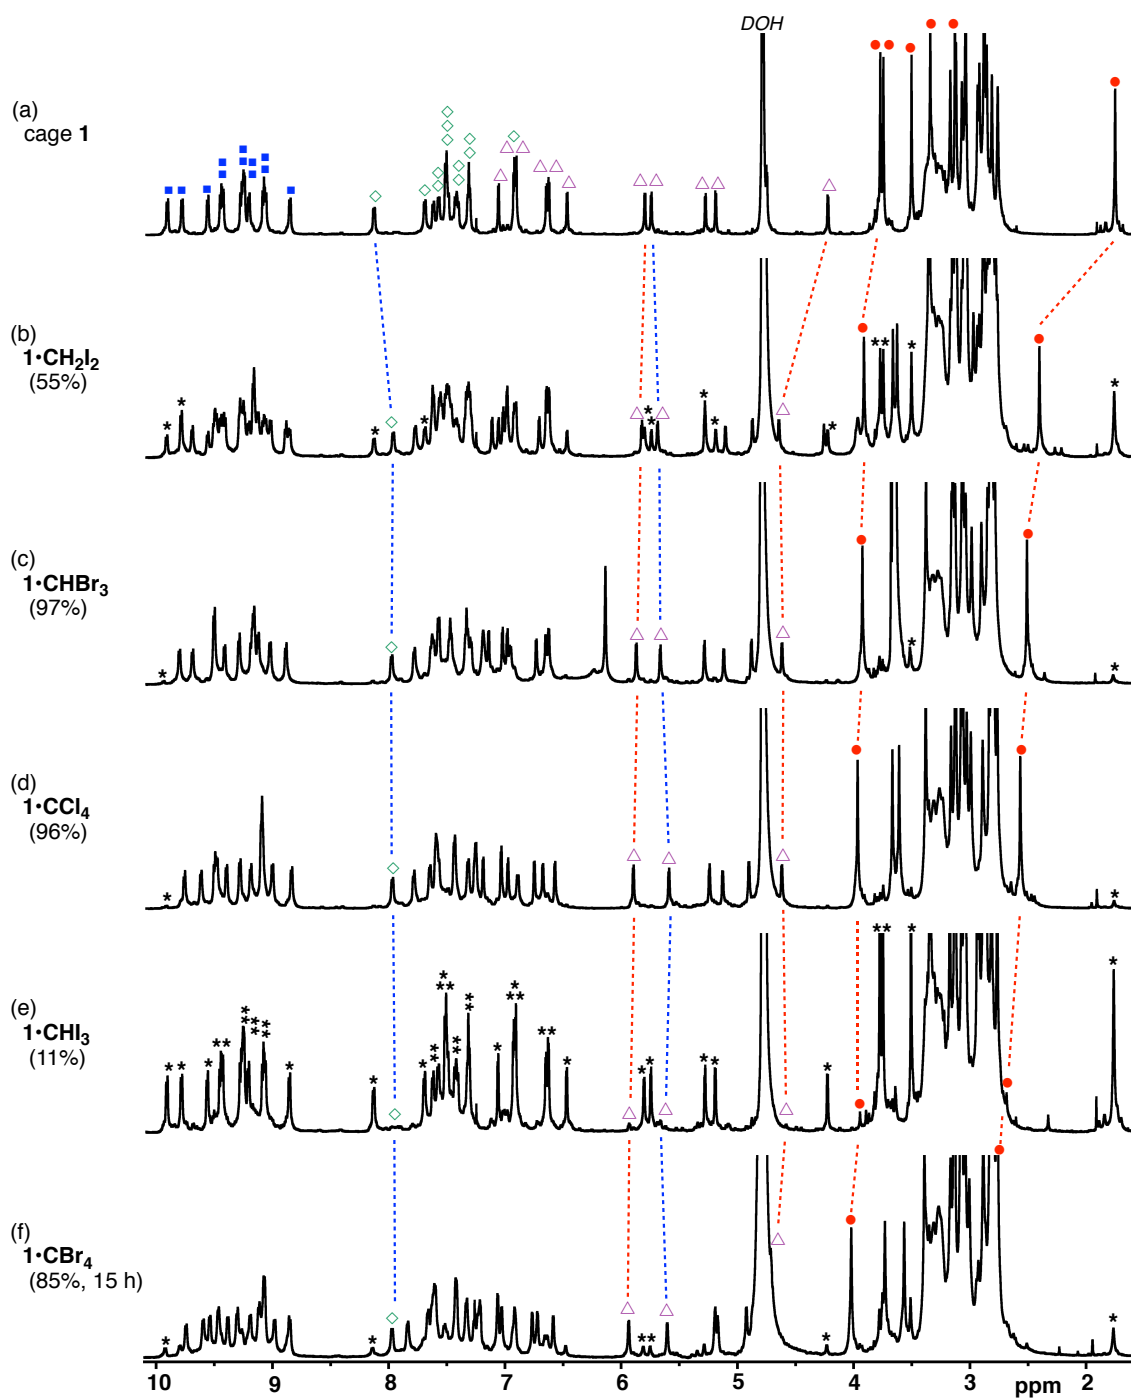

**Figure S31.**  $^1\text{H}$  NMR spectra (500 MHz, 300 K,  $\text{D}_2\text{O}$ ) of (a) **1**, (b)  $1 \cdot \text{CH}_2\text{I}_2$ , (c)  $1 \cdot \text{CHBr}_3$ , (d)  $1 \cdot \text{CCl}_4$ , (e)  $1 \cdot \text{CHI}_3$ , and (f)  $1 \cdot \text{CBr}_4$ .

## 5. X-ray crystallographic analyses of cage **1**, **1**•CCl<sub>4</sub>, and S3

### Procedures for crystallization

#### Cage **1**

An CH<sub>3</sub>CN/H<sub>2</sub>O (1:4 v/v) solution of cage **1** was stood at 50 °C and solvents were allowed to evaporate. After 10 days, a single crystal suitable for X-ray diffraction analysis was obtained.

#### Inclusion complex **1**•CCl<sub>4</sub>

Sat. NaBF<sub>4</sub> aq. was added the CH<sub>3</sub>CN/H<sub>2</sub>O (1:4 v/v) solution of cage **1**. The obtained precipitate was washed with water and dried under reduced pressure. Cage **1'** in which the counter anions were exchanged from NO<sub>3</sub><sup>-</sup> to BF<sub>4</sub><sup>-</sup> was dissolved in CH<sub>3</sub>CN, an excess amount of CCl<sub>4</sub> was added, and the mixture was stirred at room temperature for 10 min. An excess amount of NH<sub>4</sub>BF<sub>4</sub> was then added to the solution. The solution was stood at room temperature and the solvent were allowed to evaporate. After 1 day, a single crystal suitable for X-ray diffraction analysis was obtained.

**Table S1** Crystal data and structural refinement for **1**, **1•CCl<sub>4</sub>**, and **S3**

|                                                        | <b>1</b>                                                                                             | <b>1•CCl<sub>4</sub></b>                                                                                                              | <b>S3</b>                                                                                                                                             |
|--------------------------------------------------------|------------------------------------------------------------------------------------------------------|---------------------------------------------------------------------------------------------------------------------------------------|-------------------------------------------------------------------------------------------------------------------------------------------------------|
| Identification code                                    | i-42d                                                                                                | ht1419d                                                                                                                               | p-1                                                                                                                                                   |
| CCDC number                                            | 1971564                                                                                              | 1971565                                                                                                                               | 1984215                                                                                                                                               |
| Empirical formula                                      | C <sub>713.58</sub> H <sub>804.32</sub> N <sub>114.89</sub> O <sub>350.35</sub> Pd <sub>24</sub>     | C <sub>724</sub> H <sub>819</sub> B <sub>48</sub> Cl <sub>8</sub> F <sub>192</sub> N <sub>97</sub> O <sub>110</sub> Pd <sub>24</sub>  | C <sub>21</sub> H <sub>18</sub> O <sub>6</sub>                                                                                                        |
| Formula weight                                         | 19148.69                                                                                             | 19643.62                                                                                                                              | 366.35                                                                                                                                                |
| Temperature                                            | 90(2) K                                                                                              | 100.01(10) K                                                                                                                          | 90(2) K                                                                                                                                               |
| Wavelength                                             | 0.71073 Å                                                                                            | 1.54178 Å                                                                                                                             | 0.71073 Å                                                                                                                                             |
| Crystal system                                         | Tetragonal                                                                                           | Monoclinic                                                                                                                            | Triclinic                                                                                                                                             |
| Space group                                            | <i>I</i> -42d                                                                                        | <i>P</i> 2 <sub>1</sub> / <i>n</i>                                                                                                    | <i>P</i> -1                                                                                                                                           |
| Unit cell dimensions                                   | <i>a</i> = <i>b</i> = 40.908(11) Å<br><i>c</i> = 28.479(8) Å<br><i>α</i> = <i>β</i> = <i>γ</i> = 90° | <i>a</i> = 35.2184(4) Å<br><i>b</i> = 33.4270(4) Å<br><i>c</i> = 37.3137(4) Å<br><i>α</i> = <i>γ</i> = 90°<br><i>β</i> = 95.8588(10)° | <i>a</i> = 10.020(2) Å<br><i>b</i> = 11.554(2) Å<br><i>c</i> = 16.035(3) Å<br><i>α</i> = 74.125(3)°<br><i>β</i> = 84.067(3)°<br><i>γ</i> = 85.833(3)° |
| Volume                                                 | 47657(28) Å <sup>3</sup>                                                                             | 43698.0(9) Å <sup>3</sup>                                                                                                             | 1774.2(6) Å <sup>3</sup>                                                                                                                              |
| <i>Z</i>                                               | 2                                                                                                    | 2                                                                                                                                     | 4                                                                                                                                                     |
| Density (calculated)                                   | 1.334 Mg/m <sup>3</sup>                                                                              | 1.493 Mg/m <sup>3</sup>                                                                                                               | 1.372 Mg/m <sup>3</sup>                                                                                                                               |
| Absorption coefficient                                 | 0.533 mm <sup>-1</sup>                                                                               | 5.072 mm <sup>-1</sup>                                                                                                                | 0.101 mm <sup>-1</sup>                                                                                                                                |
| <i>F</i> (000)                                         | 19547                                                                                                | 19860                                                                                                                                 | 768                                                                                                                                                   |
| Crystal size                                           | 0.14 × 0.12 × 0.09 mm <sup>3</sup>                                                                   | 0.07 × 0.04 × 0.03 mm <sup>3</sup>                                                                                                    | 0.28 × 0.11 × 0.04 mm <sup>3</sup>                                                                                                                    |
| Theta range for data                                   | 0.996 to 26.460°                                                                                     | 2.249 to 62.384°                                                                                                                      | 1.325 to 28.313°                                                                                                                                      |
| Index ranges                                           | −51 ≤ <i>h</i> ≤ 51,<br>−51 ≤ <i>k</i> ≤ 51,<br>−35 ≤ <i>l</i> ≤ 35                                  | −40 ≤ <i>h</i> ≤ 39,<br>−36 ≤ <i>k</i> ≤ 38,<br>−42 ≤ <i>l</i> ≤ 38                                                                   | −13 ≤ <i>h</i> ≤ 13,<br>−15 ≤ <i>k</i> ≤ 15,<br>−20 ≤ <i>l</i> ≤ 15                                                                                   |
| Reflection collected                                   | 247406                                                                                               | 248790                                                                                                                                | 14382                                                                                                                                                 |
| Independent reflections                                | 24590 [ <i>R</i> <sub>int</sub> = 0.1389]                                                            | 68906 [ <i>R</i> <sub>int</sub> = 0.1391]                                                                                             | 8192 [ <i>R</i> <sub>int</sub> = 0.0314]                                                                                                              |
| Completeness                                           | 99.9% ( <i>θ</i> = 25.242°)                                                                          | 99.2% ( <i>θ</i> = 62.384°)                                                                                                           | 98.9% ( <i>θ</i> = 25.242°)                                                                                                                           |
| Max. and min. transmission                             | 0.7454 and 0.4738                                                                                    | 1.00000 and 0.33030                                                                                                                   | 0.7457 and 0.5879                                                                                                                                     |
| Refinement method                                      |                                                                                                      | Full-matrix least-squares on <i>F</i> <sup>2</sup>                                                                                    |                                                                                                                                                       |
| Data / restraints / parameters                         | 4590 / 1034 / 1803                                                                                   | 68906 / 2715 / 6128                                                                                                                   | 8192 / 0 / 493                                                                                                                                        |
| Goodness-of-fit on <i>F</i> <sup>2</sup>               | 1.013                                                                                                | 0.979                                                                                                                                 | 1.053                                                                                                                                                 |
| Final <i>R</i> indices<br>[ <i>I</i> > 2σ( <i>I</i> )] | <i>R</i> <sub>1</sub> = 0.0858,<br><i>wR</i> <sub>2</sub> = 0.2218                                   | <i>R</i> <sub>1</sub> = 0.0905,<br><i>wR</i> <sub>2</sub> = 0.2412                                                                    | <i>R</i> <sub>1</sub> = 0.0678,<br><i>wR</i> <sub>2</sub> = 0.1853                                                                                    |
| <i>R</i> indices (all data)                            | <i>R</i> <sub>1</sub> = 0.1422,<br><i>wR</i> <sub>2</sub> = 0.2719                                   | <i>R</i> <sub>1</sub> = 0.2005,<br><i>wR</i> <sub>2</sub> = 0.3146                                                                    | <i>R</i> <sub>1</sub> = 0.1000,<br><i>wR</i> <sub>2</sub> = 0.2057                                                                                    |
| Absolute structure parameter                           | 0.144(10)                                                                                            | —                                                                                                                                     | —                                                                                                                                                     |
| Largest diff. peak and hole                            | 0.967 and −0.513 e•Å <sup>-3</sup>                                                                   | 1.754 and −0.984 e•Å <sup>-3</sup>                                                                                                    | 0.600 and −0.309 e•Å <sup>-3</sup>                                                                                                                    |

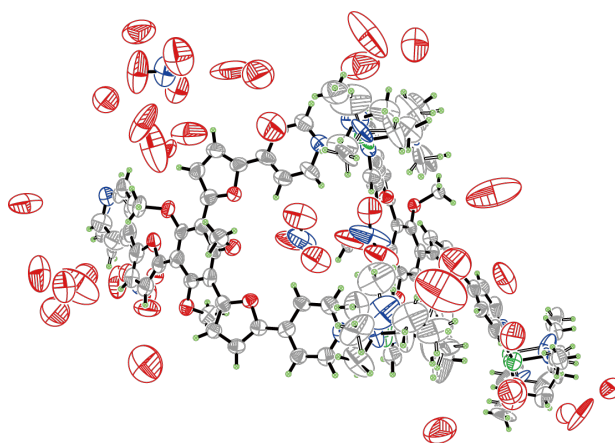

**Figure S32.** ORTEP drawings (50% probability ellipsoids) of the refinement structure of **1**.

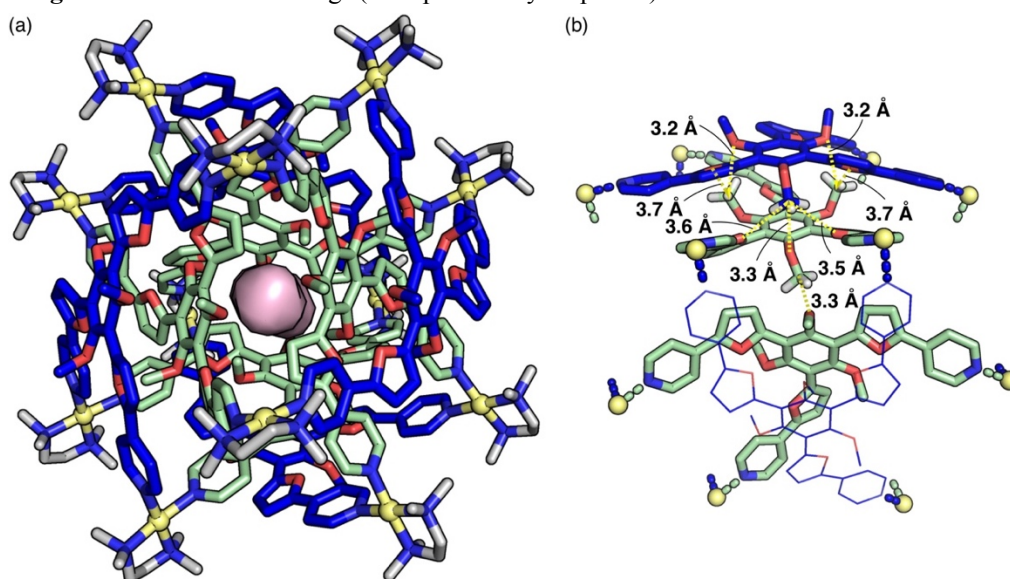

**Figure S33.** (a) Crystal structure of cage **1** (the pink object represents the cavity). (b) Hydrogen bonds between ligands of cage **1**. Hydrogen atoms, solvent molecules and anions were omitted for clarity.

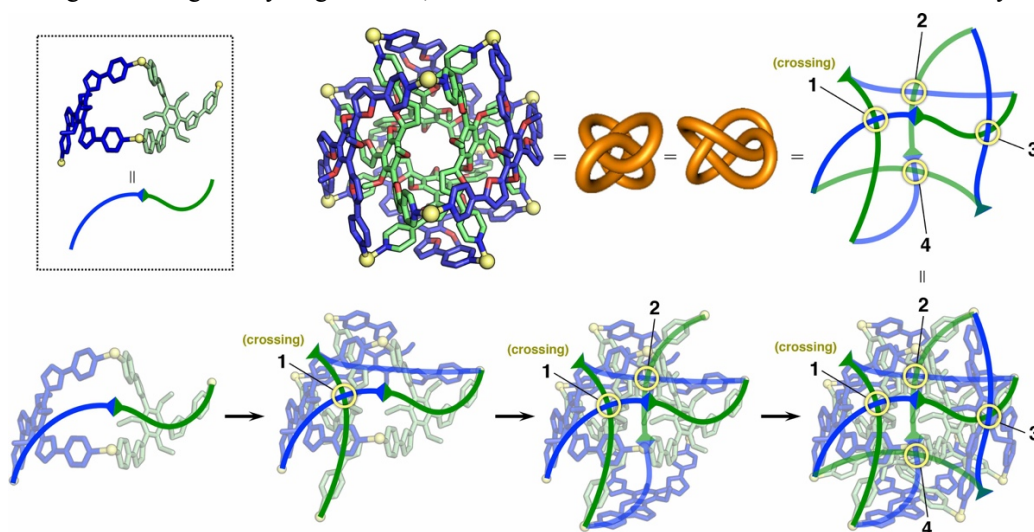

**Figure S34.** Schematic representation of the figure-eight ( $4_1$ ) knot topology of cage **1**.<sup>S3</sup>

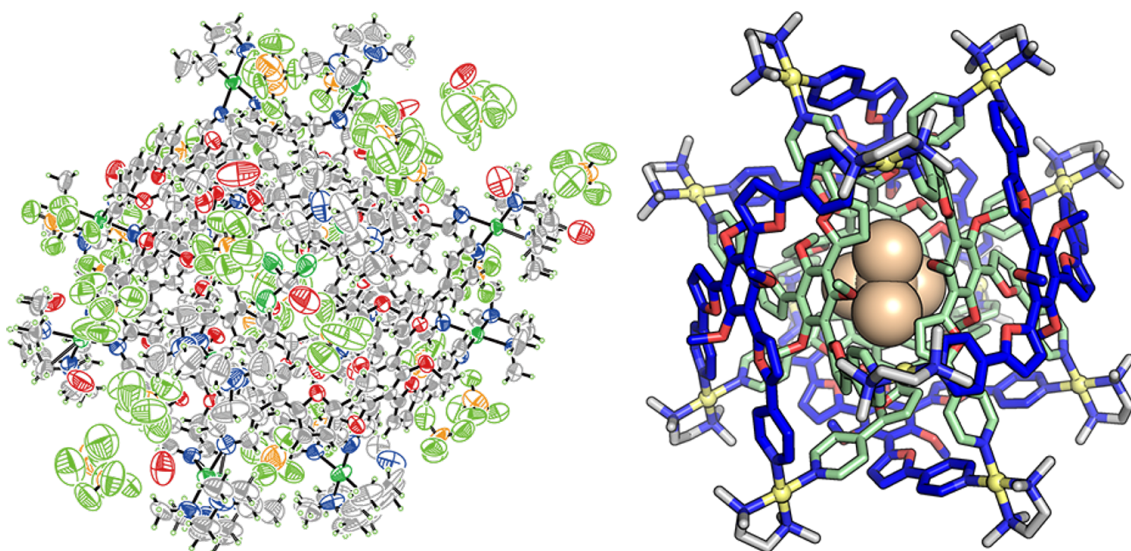

**Figure S35.** Crystal structure of **1•CCl<sub>4</sub>**. ORTEP drawings (50% probability ellipsoids) of the refinement structure of **1•CCl<sub>4</sub>** (left) and a stick model of **1•CCl<sub>4</sub>** (right, the orange object represents CCl<sub>4</sub> in the cavity). Hydrogen atoms, solvent molecules and anions were omitted for clarity).

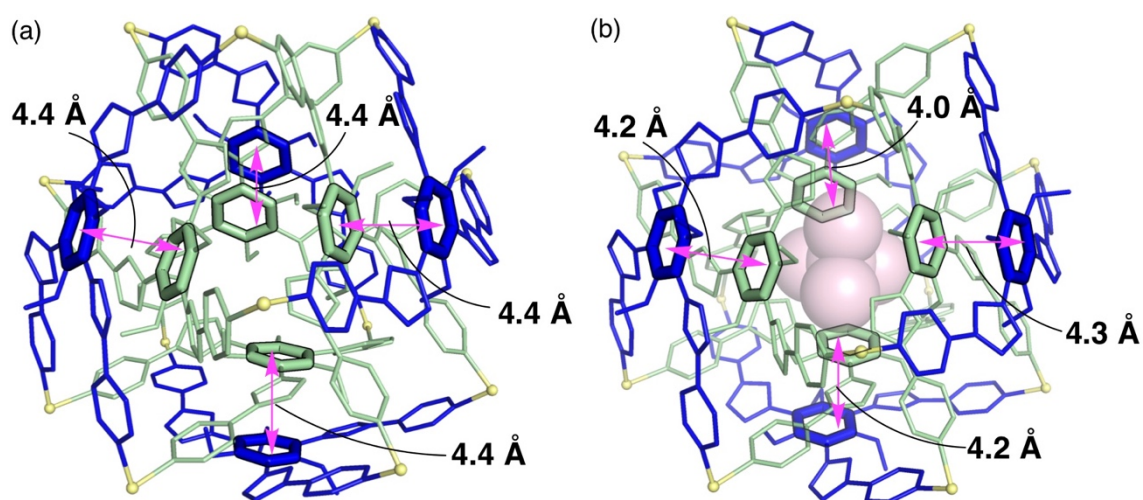

**Figure S36.** Distances between the benzene rings of outer and inner ligands in (a) cage **1** and (b) **1•CCl<sub>4</sub>**. The distances were estimated with the averages of distances between six carbon atoms on a benzene ring of an inner ligand and the least-squares plane with six carbon atoms on the benzene ring of the correspondent outer ligand.

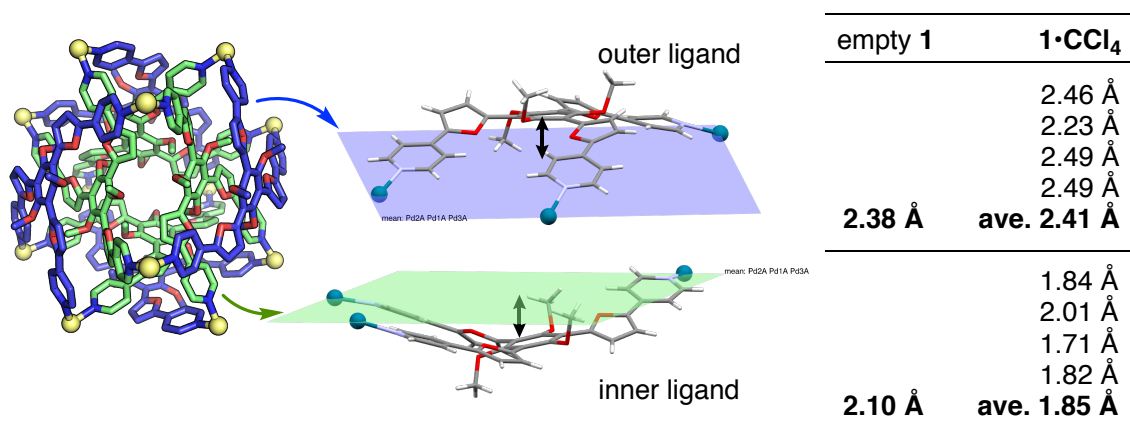

**Figure S37.** The averaged distances between the carbon atoms on the benzene core of the ligand and the plane passing through three Pd atoms connected to the ligand.

## 6. Sequential guest binding

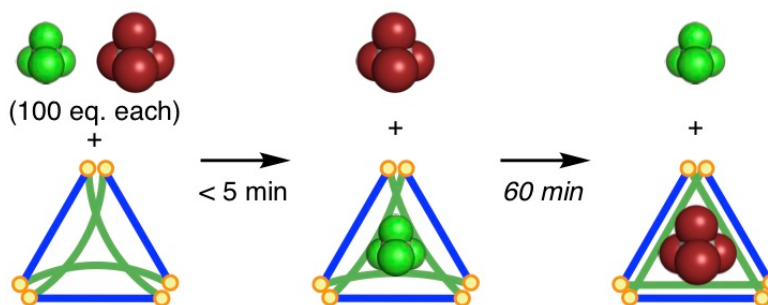

Dried powder of cage **1** (18.0 mg, 2.0  $\mu\text{mol}$ ) was dissolved in acetonitrile- $d_3$ /D<sub>2</sub>O (800  $\mu\text{L}$ , 1:4 v/v). Guest molecules (CCl<sub>4</sub> and CBr<sub>4</sub>, 100 eq. each to cage **1**) were added to the solution and <sup>1</sup>H NMR was measured immediately. <sup>1</sup>H NMR measurements were repeated after every 5-minute stirring until the total stirring time reached 60 min. The yields of the inclusion complex were determined by comparison of the integral ratios among the signals from empty cage **1**, **1**•CCl<sub>4</sub> and **1**•CBr<sub>4</sub>.



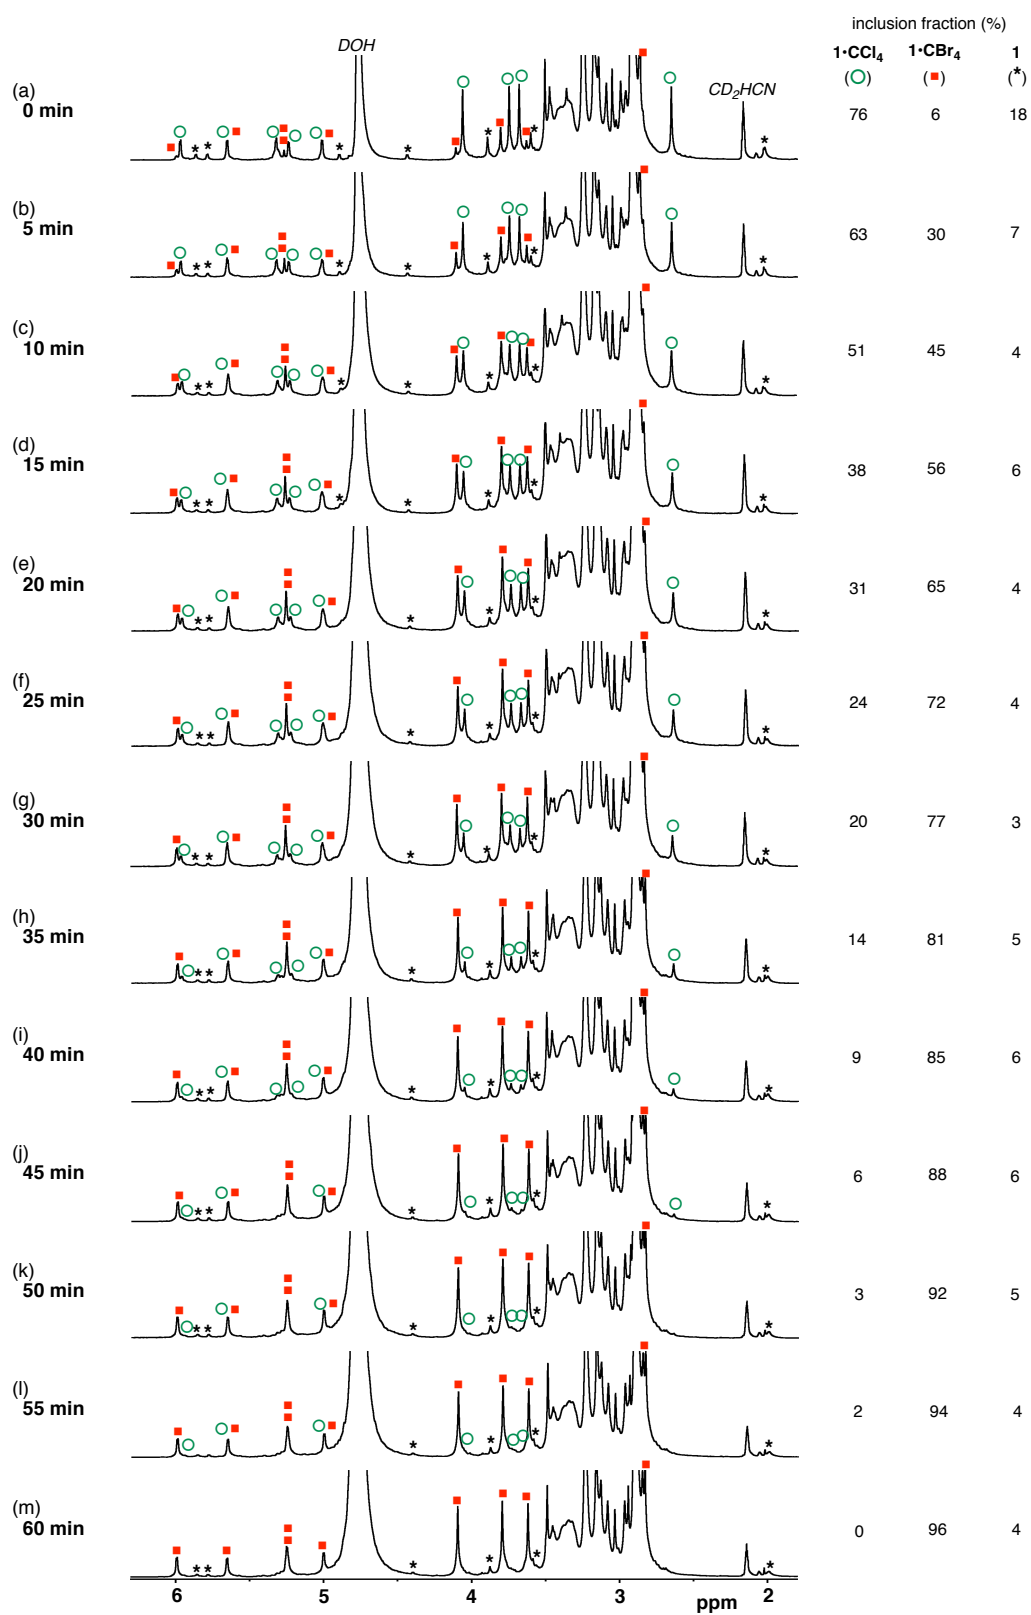

**Figure S38.**  $^1\text{H}$  NMR spectra (500 MHz, 300 K, acetonitrile- $d_3$ /D $_2$ O (1:4 v/v)) during the sequential binding.



## References

- [S1] E. Kiehlmann and R. W. Lauen, *Can. J. Chem.* **1989**, *67*, 335–344.
- [S2] K. R. Idzik, R. Beckert, E. Tauscher, Pr. Ledwon, S. Golba, M. Lapkowski, P. Rapt, L. Dunsch, and J. Frydel, *Mater. Sci. Forum.*, **2010**, 663-665, 876–879.
- [S3] The 3D models of the figure-eight knot topology were drawn by KnotPlot Version 1.0 (<https://knotplot.com/>).
